# 1 Intermittent ERK oscillations downstream of FGF in 2 mouse embryonic stem cells

3 Dhruv Raina<sup>1\*</sup>, Fiorella Fabris<sup>2\*</sup>, Luis G. Morelli<sup>1,2,3 §</sup>, Christian Schröter<sup>1 §</sup>

4  
5 <sup>1</sup> Department of Systemic Cell Biology, Max Planck Institute of Molecular Physiology, Otto-Hahn-Str.  
6 11, 44227 Dortmund, Germany

7 <sup>2</sup> Instituto de Investigación en Biomedicina de Buenos Aires (IBioBA)—CONICET—Partner Institute of  
8 the Max Planck Society, Polo Científico Tecnológico, Godoy Cruz 2390, C1425FQD Buenos Aires,  
9 Argentina

10 <sup>3</sup> Departamento de Física, FCEyN UBA, Ciudad Universitaria, 1428 Buenos Aires, Argentina

11

12

13 \*, § - these authors contributed equally

14 § - corresponding authors

15

16

## 17 Abstract

18 Signal transduction networks process extracellular signals to guide cell fate decisions such as  
19 to divide, differentiate, or die. These networks can generate characteristic dynamic activities  
20 that are shaped by their cell-type specific architecture. The differentiation of pluripotent cells  
21 is controlled by FGF/ERK signaling. However, the dynamic activity of the FGF/ERK signaling  
22 network in this context remains unexplored. Here we use live cell sensors in wild type and  
23 *Fgf4* mutant mouse embryonic stem cells to measure ERK dynamic activity in single cells, in  
24 response to defined ligand concentrations. We find that ERK activity oscillates in embryonic  
25 stem cells. Single cells can transit between oscillatory and non-oscillatory behavior, leading to  
26 heterogeneous dynamic activities in the population. Oscillations become more prevalent with  
27 increasing FGF4 dose, while maintaining a robust characteristic timescale. Our results  
28 suggest that FGF/ERK signaling operates in the vicinity of a transition point between  
29 oscillatory and non-oscillatory dynamics in embryonic stem cells.

30

31

32

33

## 34 Introduction

35 Cells rely on signal transduction networks to process signals from their environment, and to  
36 guide decisions such as to divide, differentiate, or die (Koseska and Bastiaens, 2017). These  
37 networks can produce dynamic activation patterns even at constant stimuli (Antebi et al., 2017;  
38 Santos et al., 2007). Dynamic activity patterns are shaped by the cell-type specific architecture  
39 of the signal transduction system.

40  
41 One of the most critical signal transduction systems during early mammalian embryogenesis  
42 relays signals from extracellular fibroblast growth factor 4 (FGF4) through the  
43 RAS/RAF/MEK/ERK network (Brewer et al., 2016). The differentiation of extraembryonic  
44 primitive endoderm cells in the mouse preimplantation embryo depends on FGF/ERK  
45 signaling in a dose-dependent manner (Kang et al., 2013; Krawchuk et al., 2013). Embryonic  
46 stem cells (ESCs), clonal cell populations that retain the differentiation potential of inner cell  
47 mass cells of the preimplantation embryo, are a tractable model system that recapitulates this  
48 dose-dependent function of FGF4 (Raina et al., 2020; Schröter et al., 2015). FGF/ERK  
49 signaling is also required for maturation of the epiblast lineage in the embryo (Kang et al.,  
50 2017; Ohnishi et al., 2014), and controls the corresponding process of transitioning from naïve  
51 to primed pluripotency and lineage commitment in ESCs (Kunath et al., 2007; Molotkov et al.,  
52 2017). Both in the embryo and ESCs, FGF/ERK signaling is mostly triggered by paracrine  
53 FGF4 ligands (Kang et al., 2013; Krawchuk et al., 2013; Kunath et al., 2007). Despite these  
54 well-known functions of FGF/ERK signaling during the differentiation of pluripotent cells, little  
55 is known about FGF/ERK signaling dynamics in this developmental context.

56  
57 Revealing intracellular signal transduction dynamics requires live-cell approaches in single  
58 cells. Live-cell ERK activity can be monitored with substrate-based sensors that employ FRET  
59 or subcellular localization as read-outs (Komatsu et al., 2011; Regot et al., 2014). Analysis of  
60 ERK activity in acutely stimulated ESCs expressing a FRET-based sensor revealed a transient  
61 peak of activation that decayed over long timescales (Deathridge et al., 2019). However, the  
62 short timescale ERK signaling dynamics in the continuous FGF stimulation regimes required  
63 to trigger differentiation of ESCs (Hamilton et al., 2019) remains largely unexplored.

64  
65 Short timescale ERK dynamics upon continuous stimulation of other receptor tyrosine kinases  
66 (RTKs) such as the epidermal growth factor (EGF) receptor have been studied in various cell  
67 types, revealing a diversity of behaviors. In many, but not all cell types, ERK activity occurs in  
68 pulses (Aoki et al., 2013). In several cell types, the frequency of ERK activity pulses depends

69 on EGF concentration or cell density (Albeck et al., 2013; Aoki et al., 2013). This has led to  
70 the suggestion of frequency-modulated encoding of information about extracellular signal  
71 levels by the RAS/RAF/MEK/ERK network downstream of the EGF receptor (Albeck et al.,  
72 2013). In mammary epithelial cells in contrast, pulses of ERK nuclear translocation have a  
73 constant frequency across a range of EGF stimulation levels (Shankaran et al., 2009).

74

75 Here we use a translocation-based sensor (Regot et al., 2014) to measure short timescale  
76 ERK activity dynamics in single ESCs upon continuous FGF stimulation. We find that ERK  
77 activity is pulsatile in ESCs, and develop concepts and analysis methods to quantitatively  
78 characterize dynamic signatures of pulsing. ERK activity pulses in ESCs are faster than any  
79 previously reported ERK dynamics. Pulses occur with high regularity consistent with an  
80 oscillatory behavior in a subset of cells. We detect no pulsing in unstimulated *Fgf4* mutant  
81 cells, indicating that ERK pulses are driven by FGF4. Controlling extracellular ligand levels in  
82 the mutant background, we show that individual ERK pulses have a duration that is  
83 independent of ligand levels. However, the extent of the oscillatory behavior increases with  
84 FGF4 dose. Finally, we show that ERK pulsing is more prevalent in the early stages of the cell  
85 cycle. Our data suggest that the FGF/ERK signal transduction system in ESCs transits  
86 between oscillatory and non-oscillatory behavior.

87

## 88 Results

### 89 ERK activity is dynamic in ESCs

90 We first explored ERK activation in single ESCs under constant culture conditions that  
91 maintain pluripotency. We stained for phosphorylated ERK (pERK) in cells growing in  
92 serum + LIF (S+L) and quantified whole-cell pERK levels. We observed pERK staining in cells  
93 growing in serum + LIF which was absent in the presence of the MEK-inhibitor PD0325901  
94 (MEKi) (Fig. 1A, B). pERK staining was more heterogeneous in serum + LIF than in the MEKi  
95 control. Almost all cells in serum + LIF had pERK staining values above the range covered by  
96 MEKi cells (Fig. 1B).

97

98 The heterogeneous pERK staining in serum + LIF could purely reflect long-term variability  
99 between cells as previously reported (Deathridge et al., 2019). In addition, short-term signaling  
100 fluctuations could contribute to this variability. To test the extent of short-term signaling  
101 fluctuations, we integrated a translocation-based sensor to measure ERK activity in live cells.  
102 We generated this cell line by single copy insertion of the ERK-KTR-mClover construct into  
103 the *Hprt* open locus (Fig. 1C) to ensure uniformity in expression. Transgenic cells continued

104 to express pluripotency markers (Fig. 1 Supp. 1), and transmitted to the germline of chimeric  
105 mice (Simon et al., 2020), indicating that reporter expression does not interfere with  
106 pluripotency and differentiation potential.

107

108 Phosphorylation of the ERK target site of the sensor leads to its export from the nucleus, thus  
109 reporting ERK activity as the cytoplasmic to nuclear (C/N) ratio of reporter localization (Regot  
110 et al., 2014) (Fig. 1C). Snapshots of cells growing in serum + LIF showed that the sensor  
111 preferentially localized to the cytoplasm, in contrast to the MEKi treated control where it was  
112 uniformly distributed (Fig. 1D). Furthermore, the C/N ratio of sensor localization was more  
113 variable between cells growing in serum + LIF compared to the MEKi-treated control (Fig. 1E),  
114 in line with heterogeneous pERK staining. These qualitative similarities between pERK  
115 staining and reporter C/N ratios suggest that the reporter is suited to explore short-term ERK  
116 dynamics in ESCs.

117

118 We next recorded dynamic changes of reporter localization by imaging reporter cells at 20  
119 second time intervals for up to two hours. In these time-lapse movies we could observe  
120 repetitive translocation of the sensor back and forth from the nucleus of cells growing in serum  
121 + LIF, which were absent in MEKi (Fig. 1F; Supp. Movie S1). To validate that these  
122 observations reflected genuine ERK activity, we transfected two spectrally compatible  
123 orthogonal ERK activity sensors in the same cells. Both sensors showed similar and highly  
124 correlated dynamic behavior (Fig. 1 Supp. 2). These sensors rely on different ERK substrate  
125 sequences, and deploy FRET (Komatsu et al., 2011) and translocation as two distinct read-  
126 outs. This indicates that pulsatile nuclear export of the KTR sensor reflects genuine ERK  
127 dynamics.

128

129 To quantify dynamic activity in single cells over time, we measured mean fluorescence  
130 intensity of the negative image in a region of interest within the nucleus (Methods). Thus, high  
131 values of the resulting KTR signal reflect high ERK activity, maintaining consistency with the  
132 representation in Fig. 1E. This analysis confirmed repeated pulses of sensor translocation in  
133 serum + LIF medium, which were suppressed by treatment with MEKi (Fig. 1G, Fig. 1 Supp.  
134 3). We observed a broad range of dynamic behaviors across the population: some cells  
135 showed regular pulsing reminiscent of oscillations (\* in Fig. 1G), and some showed isolated  
136 pulses (\*\*). We also observed transitions between non-pulsing and pulsing behavior within the  
137 same cell (\*\*\*). We conclude that ESCs display a range of pulsatile ERK activity dynamics  
138 when cultured in serum + LIF.

139

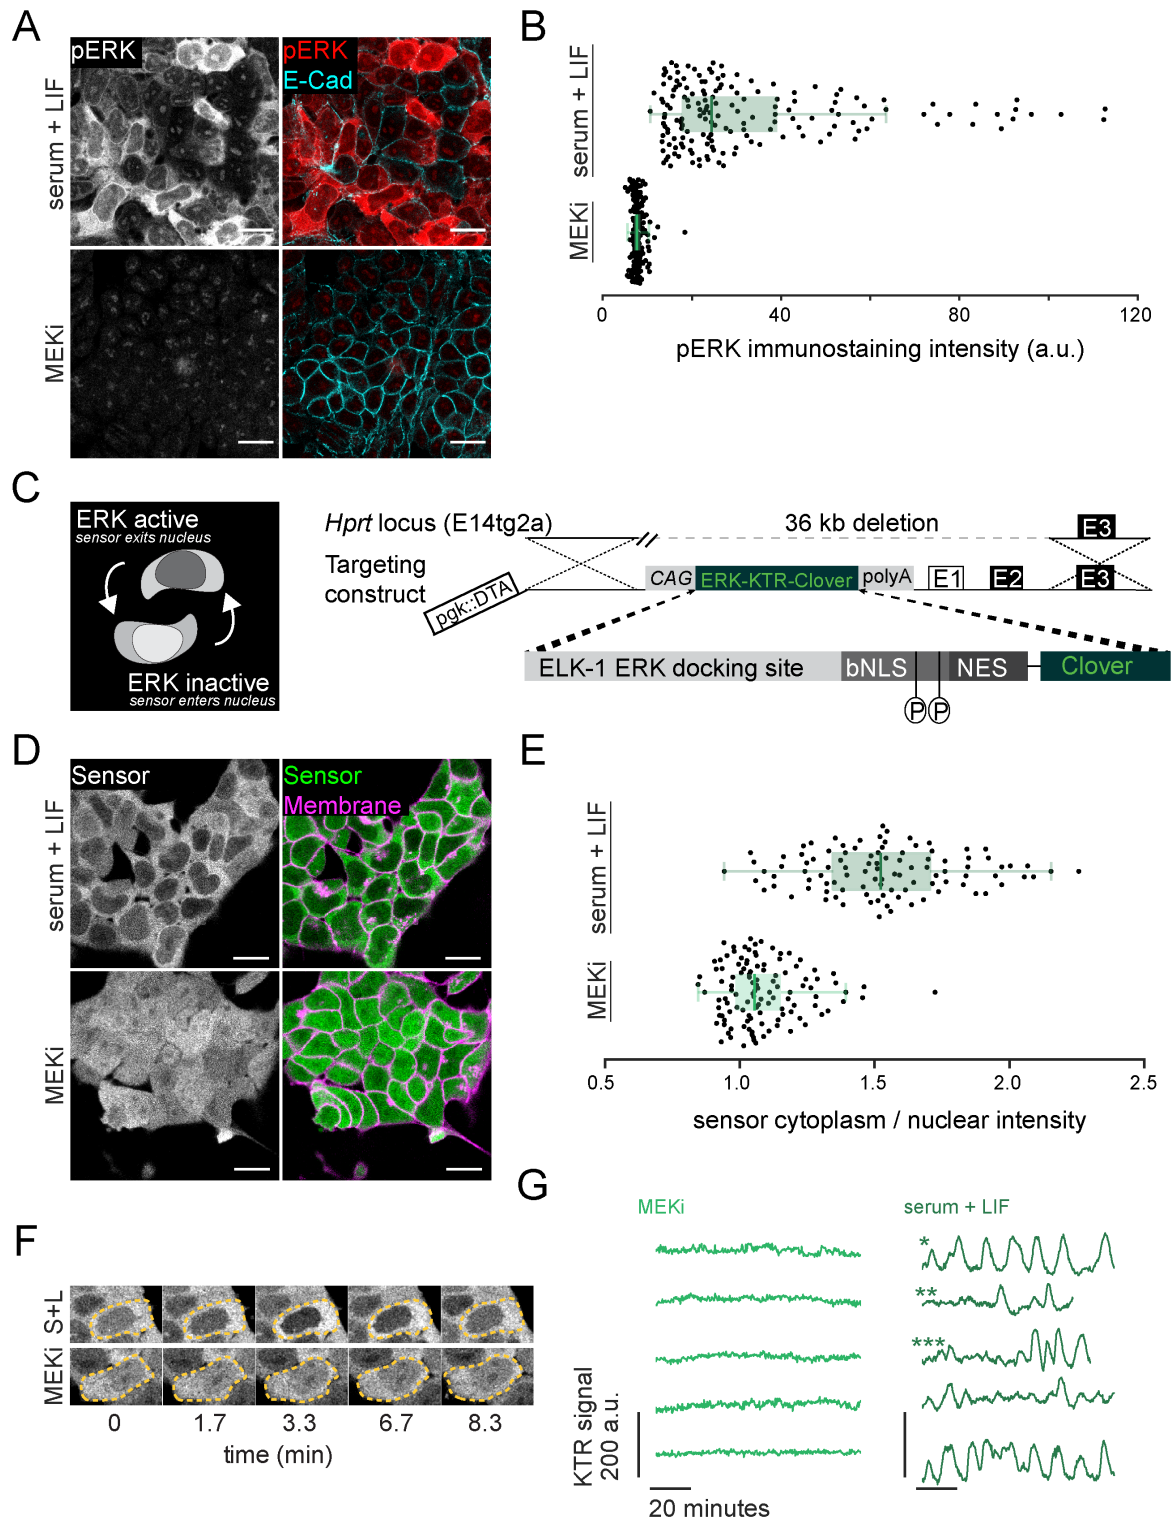

140

141 **Fig. 1. A targeted translocation sensor reveals pulsatile ERK activity in ESCs**

142 **A.** Immunostaining of mESCs growing in serum + LIF medium without (top) or with MEKi (bottom) for pERK and  
 143 E-Cadherin to mark membranes. The punctate pERK staining within the nucleus is insensitive to MEK inhibition,  
 144 suggesting it is non-specific. Scale bar = 20  $\mu$ m. **B.** Quantification of fluorescence staining intensities in single cells  
 145 stained as in A.  $n \geq 100$  per condition, green bars indicate medians (Median<sub>S+L</sub>=24.39 a.u., Median<sub>MEKi</sub>=7.75 a.u.;

146  $CV_{S+L}=0.67$ ,  $CV_{MEKi}=0.17$ ), box bounds are the 25 and 75 percentiles of the distributions, and whiskers are the 5  
147 and 95 percentiles. **C.** Schematic of the ERK-KTR sensor and targeting construct for integration into the *Hprt* locus.  
148 **D.** Subcellular localization of ERK-KTR sensor in live cells in serum + LIF without (top) and with MEKi (bottom).  
149 Membranes are stained with live-cell membrane dye CellMaskRed. Scale bar = 20  $\mu\text{m}$ . **E.** Quantification of  
150 cytoplasmic to nuclear ratio of sensor fluorescence in single cells imaged as in **D**, green bars indicate medians  
151 ( $Median_{S+L}=1.52$ ,  $Median_{MEKi}=1.05$ ;  $CV_{S+L}=0.18$ ,  $CV_{MEKi}=0.13$ ), box bounds are the 25 and 75 percentiles of the  
152 distributions, and whiskers are the 5 and 95 percentiles. **F.** Stills from a movie of ERK-KTR expressing cells growing  
153 in serum + LIF without (top) and with MEKi (bottom). Dashed line indicates cell outlines. **G.** Representative traces  
154 of the KTR signal obtained as the mean inverted fluorescence intensity within a nuclear ROI in single cells growing  
155 in serum + LIF without (right) and with MEKi (left).

---

156

157

158

159

## 160 **Intermittent ERK oscillations in ESCs**

161 The broad range of dynamic behaviors that we observed qualitatively across the population  
162 prompted us to systematically investigate the dynamic signatures of ERK activity in ESCs.

163

164 Since ERK activity pulses were a prominent feature of the dynamics, we sought to identify  
165 single pulses in time series. We first annotated the timepoints of local maxima and minima,  
166 and then used timeseries of MEKi treated cells to set a threshold for filtering ERK dependent  
167 pulses from background fluctuations (Fig. 2A, Fig. 2 Supp. 1, Supp. Table T1, Methods). Most  
168 cells (64/69, 93%) showed pulses in serum + LIF, while very few (2/67, 3%) showed any pulse  
169 in MEKi. The total fraction of time that single cells were pulsing was variable: some cells pulsed  
170 continuously, others showed a mixture of pulsing and non-pulsing behavior –termed silent–  
171 and yet others were non-pulsing throughout the experiment (Fig. 2B). On average, cells were  
172 pulsing ( $32 \pm 3\%$ ) (mean  $\pm$  SEM) of the time in serum + LIF alone, but only ( $0.13 \pm 0.09\%$ ) of  
173 the time in the presence of MEKi (Fig. 2B).

174

175 To determine general characteristics of pulsing activity in the population, we introduced a set  
176 of quantitative measures: the amplitude and duration of single pulses, and the interpulse and  
177 silence intervals between successive pulses (Fig. 2C). The amplitude of a pulse was defined  
178 as the average difference between the peak value and the neighboring local minima (Fig. 2C).  
179 Our thresholding parameters only filter the tail of the amplitude distribution, containing low  
180 amplitude fluctuations that fall within the range of background levels determined from time  
181 series of MEKi-treated cells (yellow area in Fig. 2D).

182

183 We defined the duration of a pulse as the time elapsed between the two local minima flanking  
184 the maximum of the pulse (Fig. 2C, Methods). The distribution of pulse durations has a well-  
185 defined mode at 6.33 min and is slightly asymmetric (Fig. 2E). We observed no pulses shorter  
186 than 3 min, a timescale much longer than the detection limit of 40 seconds given by our  
187 algorithm and our sampling frequency. The congruence of the KTR and FRET sensors  
188 suggest that the pulse durations that we can capture are not limited by the timescales of sensor  
189 transport (Fig. 1 Supp. 2). Therefore, we conclude that ERK pulses have a minimum duration.  
190 Pulses with long durations tended to have large amplitudes, and those with short durations  
191 clustered at low amplitude values (Fig. 2 Supp. 2).

192

193 The interpulse interval (IPI) was defined as the time between the maxima of two neighboring  
194 pulses (Fig. 2C). The mode of the IPI distribution was 7.67 min, similar to the mode of the  
195 pulse duration (Fig. 2F). This suggests the presence of consecutive pulses, occurring  
196 immediately one after another. Consecutive pulses have either shared minima, or are  
197 separated by intervals of silence that are short relative to their pulse duration. As each  
198 interpulse interval can be decomposed into a silence interval and a joint pulse duration (Fig.  
199 2C, Methods), we used these quantities to define consecutiveness in a way that accounts for  
200 differences in pulse duration. In a plot of joint duration against silence interval duration, sparse  
201 events will lie in the lower right region, while consecutive pulses will populate the upper left.  
202 Here we defined consecutive pairs of pulses as those with a silent interval of less than half the  
203 joint pulse duration (dashed line, Fig. 2G). With this definition, 52% of all pairs of pulses in  
204 cells growing in serum + LIF lay above the threshold and were classified as consecutive (Fig.  
205 2G).

206

207 In summary, our analysis reveals that ERK pulses in ESCs growing in serum + LIF have a  
208 characteristic duration and are often part of consecutive sequences. We interpret this behavior  
209 as intermittent oscillations, where silent periods alternate with isolated pulses and oscillations  
210 – here defined as consecutive pulses with a characteristic duration.

211

212

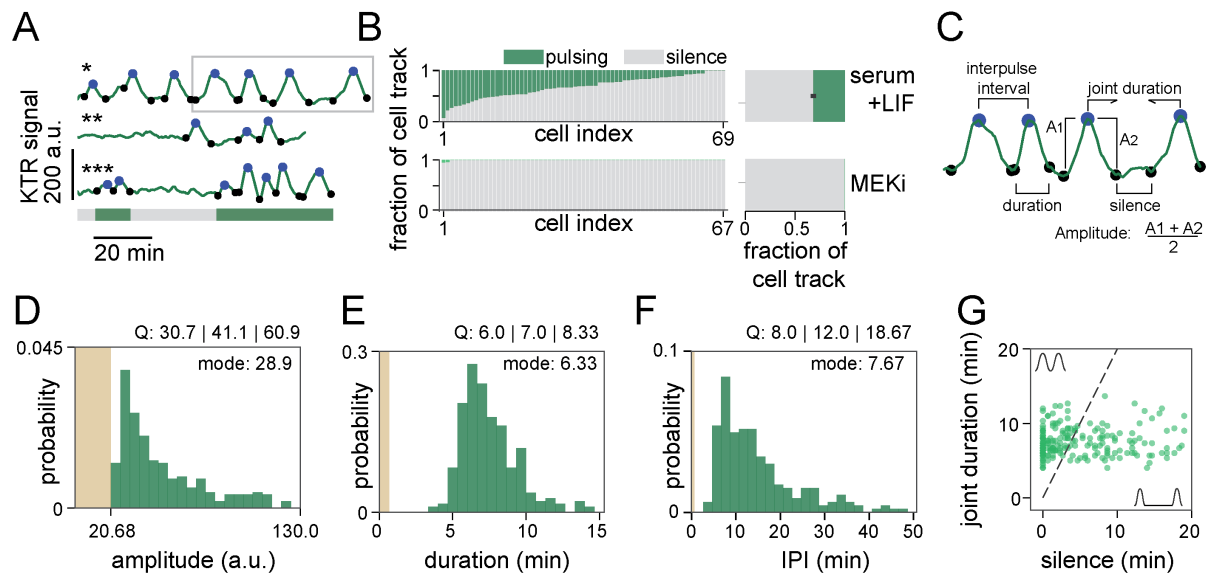

213

214

### Fig. 2. Time series analysis reveals intermittent ERK oscillations in ESCs

215

216

217

218

219

220

221

222

223

224

225

226

227

228

229

230

231

232

### ERK oscillations are driven by FGF4

233

234

235

236

237

ERK activity is dynamic in many cell types (Albeck et al., 2013; Aoki et al., 2017; de la Cova et al., 2017; Goglia et al., 2020; Hiratsuka et al., 2015; Mayr et al., 2018; Pokrass et al., 2020; Shankaran et al., 2009; Simon et al., 2020). Extracellular signals can change the characteristics of these dynamics, such as pulse frequency (Albeck et al., 2013; Aoki et al., 2013). In ESCs, FGF4 is the main ligand that activates ERK (Kunath et al., 2007). We therefore



238 asked how ERK dynamics depend on FGF4 concentration. To be able to control FGF4  
239 concentration externally, we introduced an *Fgf4* loss of function mutation in the sensor line. In  
240 the chemically defined N2B27 medium that contains only minimal amounts of recombinant  
241 growth factors, *Fgf4* mutant cells were viable, but pERK levels were strongly reduced (Supp.  
242 Movie S2, Fig. 3 Supp. 1A). For stimulation, we chose FGF4 concentrations from 2.5 to 20  
243 ng/ml. These concentrations cover the dynamic range of FGF4-response at the level of ERK  
244 phosphorylation (Fig. 3 Supp. 1B, C), transcription of an FGF/ERK-dependent reporter gene  
245 (Fig. 3 Supp. 1D, E), and differentiation along the primitive endoderm lineage (Raina et al.,  
246 2020). To measure the steady-state signalling response to different ligand levels, we pre-  
247 treated cells with the respective FGF4 concentrations for 24 h in pluripotency conditions, and  
248 replenished the medium 4 h before starting the recording (Fig. 3A, Methods). In the absence  
249 of FGF4 stimulation, we observed almost no pulsing. Widespread pulsatile activity was  
250 observed at all FGF4 concentrations tested, indicating that FGF4 triggers ERK pulsing (Fig.  
251 3B, Fig. 3 Supp. 2, Supp. Movie S2). To identify pulses, we employed a similar strategy as  
252 above, setting a threshold based on the untreated condition and the highest FGF4  
253 concentration (Fig. 3 Supp. 3, Methods).

254

255 The distribution of sensor pulse amplitudes was not significantly different amongst the three  
256 concentrations (Fig. 3 Supp. 4A, Methods, Supp. Table T2). However, immunostaining and  
257 single cell analysis revealed that the median, the lower end, as well as the variance of the  
258 pERK distributions shifted to larger values with increasing FGF concentration (Fig. 3 Supp.  
259 4B, C). Thus, it is possible that the amplitude of pERK pulses increases with FGF  
260 concentration, without translating into a measurable increase in sensor pulse amplitude.

261

262 The total fraction of time that single cells were pulsing increased with FGF4 concentration in  
263 the range from 0 to 5 ng/ml (Fig. 3C), to levels similar to those measured in wild type cells in  
264 serum + LIF. We wondered how the number of pulses and their duration contributed to this  
265 increase in pulsing time. We defined a single cell pulse rate as the number of pulses divided  
266 by the duration of the trace, and found that it increases with FGF4 concentration in the same  
267 range (Fig. 3D). The distribution of pulse durations overlapped between the three FGF4  
268 concentrations, and their modal values were conserved (Fig. 3E). We observed a subtle trend  
269 towards narrower distributions with higher FGF4 concentrations, yet these were significantly  
270 different only between the 2.5 ng/ml and 20 ng/ml conditions (Supp. Table T2, Methods). Thus,  
271 the increase in pulsing time is largely due to an increase in pulse rate rather than pulse  
272 duration. In line with stable pulse durations, the IPI distributions had a similar modal value of  
273 about 7 min in all conditions. However, IPIs became more narrowly distributed with increasing

274 FGF4, with a clear difference between 2.5 and 20 ng/ml FGF4 (Fig. 3F, Supp. Table T2).  
275 Narrower IPI distributions at high FGF concentrations indicated more regular pulsing.

276

277 To determine whether the extent of consecutive pulsing was controlled by FGF4, we plotted  
278 joint pulse duration against silence interval duration (Fig. 3G). In the population, the fraction  
279 of consecutive pulses increased steadily across the entire FGF concentration range from  
280 49.2% (2.5 ng/ml) to 57.6% (5 ng/ml), and 63.9% (20 ng/ml). We counted isolated and  
281 consecutive pulses in single cell traces to evaluate their contribution to this population  
282 behavior. Here, isolated pulses include those from non-consecutive pairs as well as those  
283 from traces with single pulses in which no silence intervals were defined. The proportion of  
284 cells showing only isolated pulses decreased from 43% (17 out of 40) at 2.5 ng/ml FGF4 to  
285 18% (10 out of 56) and 24% (16 out of 65) at 5 ng/ml and 20 ng/ml, respectively. In the cells  
286 that showed consecutive pulsing, the fraction of consecutive pulses increased with FGF4  
287 across the entire concentration range that we tested (Fig. 3H).

288

289 In summary, these results reveal that ERK pulses have a characteristic duration that is  
290 independent from FGF4 concentration. The increase of both pulse rate and consecutiveness,  
291 together with the narrowing of duration distributions, suggest that FGF dose controls the extent  
292 as well as the precision of ERK oscillations.

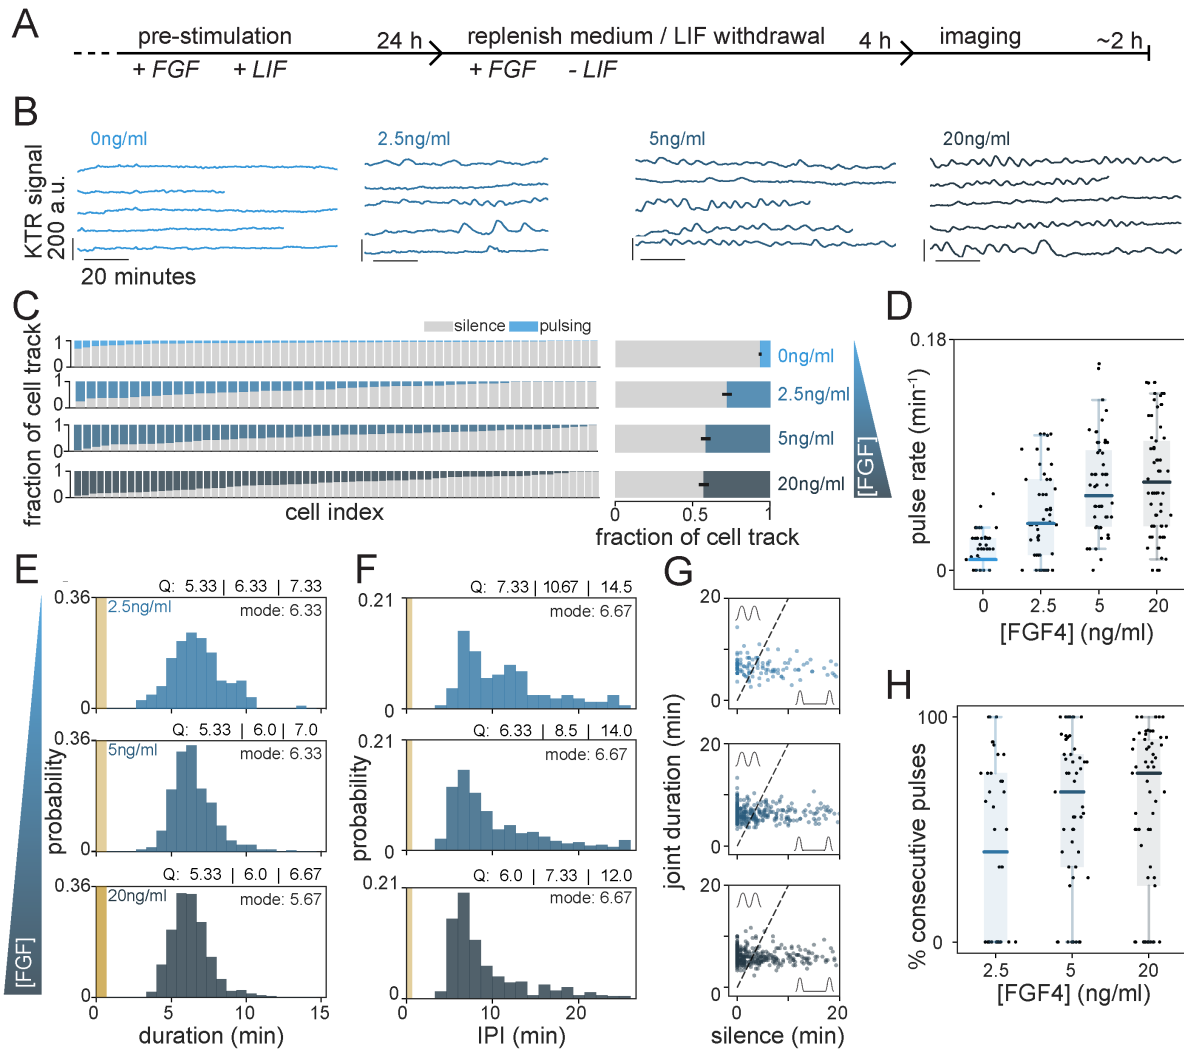

293

294

### Fig 3. Pulsing and regularity of ERK activity are controlled by FGF4 dose

295

296

297

298

299

300

301

302

303

304

305

306

307

308

309

310

311

**A.** Schematic of experimental protocol to measure the steady state signaling response to defined FGF4 ligand levels. **B.** Representative traces of smoothed time series of ERK dynamical activity in single *Fgf4* mutant cells stimulated with different FGF4 doses. **C. Left:** Fraction of time that individual cells stimulated with different concentrations of FGF4 spent pulsing (blue), or non-pulsing (grey). **Right:** Average time that cells in the population were pulsing (blue) or non-pulsing (grey). Error bar indicates SEM. **D.** Pulse rate boxplots at different concentrations of FGF4. **E.** Pulse duration distributions. The number of pulses was  $n = 164$  (2.5ng/ml),  $n = 426$  (5ng/ml) and  $n = 544$  (20ng/ml). **F.** Distributions of interpulse intervals between pairs of successive pulses. The number of successive pulses was  $n = 124$  (2.5ng/ml),  $n = 370$  (5ng/ml) and  $n = 479$  (20ng/ml). Pulse recognition resolution limit (yellow bar) and quartiles (Q) 25, 50 and 75 are indicated in **E** and **F**, and histograms are normalized to 1. **G.** Joint pulse duration vs. silence intervals for successive pairs of pulses. The slope 2 dashed line classifies pairs of pulses into consecutive (above) and non-consecutive (below). The axes range was adjusted to better resolve individual data points, leaving off the scale 6 of 124 (2.5ng/ml FGF4), 26 out of 370 (5ng/ml FGF4) and 33 out of 479 (20ng/ml FGF4) data points. Number of cells in **C–G**:  $N = 61$  (0ng/ml FGF4),  $N = 48$  (2.5ng/ml FGF4),  $N = 57$  (5ng/ml FGF4) and  $N = 69$  (20ng/ml FGF4). **H.** Ratio of consecutive pulses to the total number of pulses in single cells. Number of cells was  $N = 41$  (2.5 ng/ml),  $N = 56$  (5 ng/ml) and  $N = 67$  (20 ng/ml), cells with no pulses were not included. Box plots (**D**, **H**): Black dots represent individual cells, color bars are the median, box bounds are the 25 and 75 percentiles of the distributions, and whiskers are the 5 and 95 percentiles.

312

313

314 **ERK pulses are more prevalent early in the cell cycle**

315 We noted that within the same experimental condition, there was significant cell-to-cell  
316 variability in pulsing activity (Fig. 2B, Fig. 3C). This observation could result from stable  
317 differences in pulsing behavior between cells. Alternatively, single cells could transition back  
318 and forth between pulsing and non-pulsing states, which would show up as different behaviors  
319 when observation times are limited in comparison to the characteristic times of such  
320 transitions. To identify changes in pulsing behavior of single cells over longer timescales, we  
321 recorded movies for 18 hours such that cells could be followed from birth to division (Fig. 4A,  
322 Fig. 4 Supp. 1). Increasing the frame intervals to 105 s reduced overall light exposure, while  
323 still allowing to resolve pulses that are at least 3.5 min apart. We recorded pulsing in wild type  
324 cells growing in N2B27 medium, thereby exclusively focusing on pulsing driven by paracrine  
325 FGF4 signaling, and avoiding possible ligand depletion that could occur with exogenous  
326 FGF4. We established an alternative peak-finding approach to quantify and annotate these  
327 low temporal resolution traces (Fig. 4B, Fig. 4 Supp. 2, Methods). We made raster plots  
328 showing occurrence of pulses in cells that we could follow from immediately after cell division  
329 (Fig. 4C). Visual inspection of these raster plots suggested that pulses were concentrated  
330 towards the beginning of the cell cycle. A change in pulsing activity over time could be a  
331 consequence of cell cycle effects on pulsing, or it could result from non-stationary  
332 experimental conditions.

333

334 To visualize the contributions from these two possible causes, we introduced a two-  
335 dimensional time map. The coordinates in this map are experimental time  $T_e$ , which is time  
336 measured from the beginning of the time lapse movie and  $T_b$ , the time relative to individual  
337 cell birth. For each cell  $i$ , the trace begins at  $T_b^i = 0$  and experimental time  $T_e^i$ , the time when  
338 cell  $i$  was born measured from the beginning of the movie. From this point in the map, individual  
339 traces would fall along a diagonal line of unit slope. To reveal the population behavior and  
340 avoid superposition of individual traces in the map, we plot pulse rate averaged in 70 min bins  
341 along both axes. In each bin, we count the total number of pulses from all traces in that bin  
342 and divide by the total number of minutes of recording that contribute to that bin. On this pulse  
343 rate map, cell cycle effects would manifest as a rate change in the horizontal direction (Fig.  
344 4E, upper panel) while non-stationary experimental conditions would manifest as a change in  
345 rate in the vertical direction (Fig. 4E, lower panel).

346

347 Inspection of the pulse rate time map revealed a higher pulse rate at the bottom left of the plot  
 348 that decreased both towards the right and the top (Fig. 4F). This behavior indicates that pulse  
 349 rate decays across the cell cycle, in addition to effects of non-stationary experimental  
 350 conditions. To quantify this observation, we further binned pulse rate at larger timescales (Fig.  
 351 4G). In this coarse-grained map, pulse rate within the same experimental time window was  
 352 consistently higher in cell populations which were earlier in their cell cycles. We obtained  
 353 similar results when applying an alternative detrending strategy (Fig. 4 Supp. 2, Fig. 4 Supp.  
 354 3), as well as when analyzing cells growing in serum + LIF medium (Fig. 4 Supp. 4). Taken  
 355 together, these results confirm that cells are more prone to pulse earlier in their cell cycle.  
 356  
 357

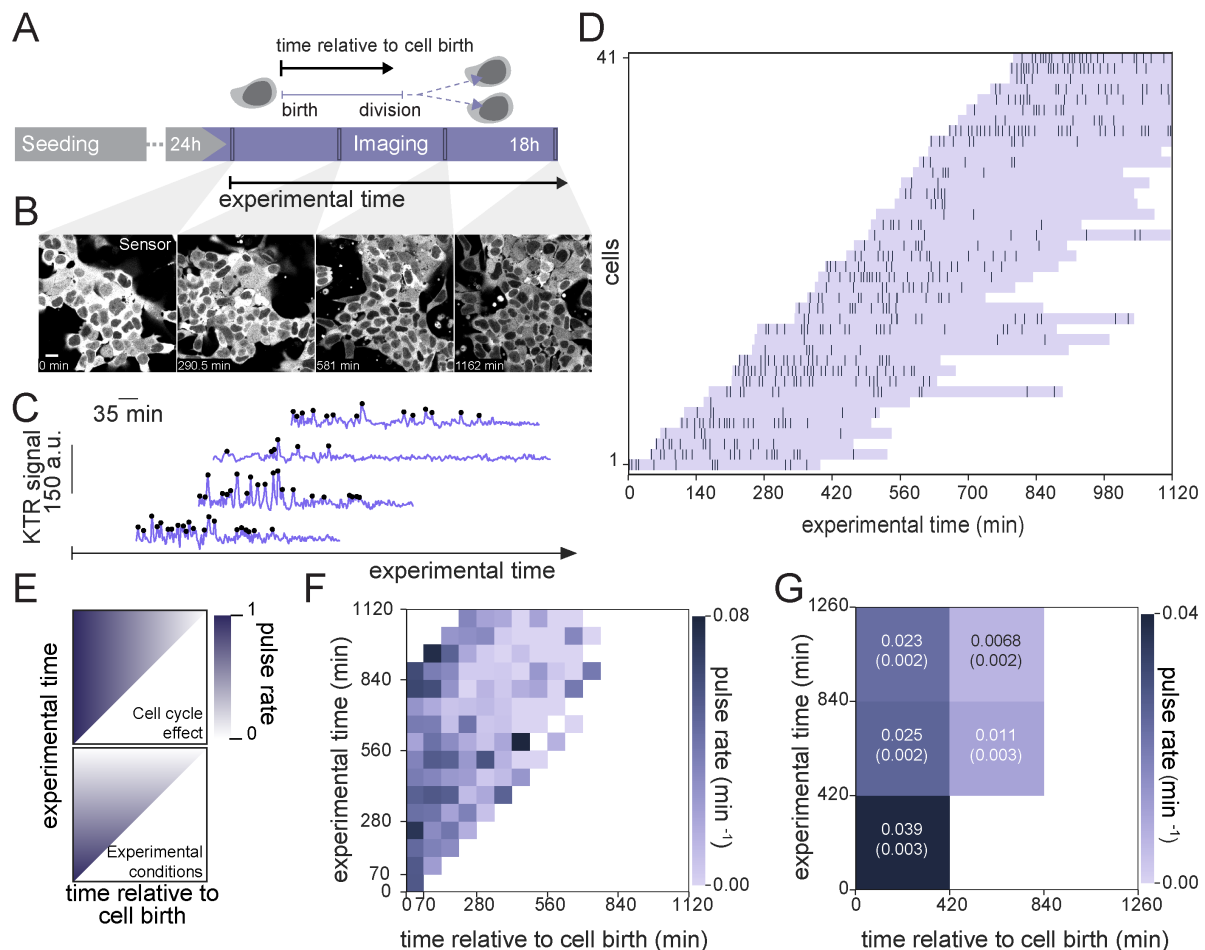

358

359

**Fig. 4. ERK pulsing is more prevalent early in the cell cycle**

360 **A.** Schematic of experimental protocol to record ERK peaks across complete cell cycles. **B.** Montage of an ESC  
 361 colony expressing the ERK-KTR sensor over the course of a long-term imaging experiment. Scale bar = 20  $\mu\text{m}$ . **C.**  
 362 Representative filtered traces of ERK dynamical activity with identified peaks (black dots), in single wild type cells  
 363 growing in N2B27 medium. **D.** Raster plot displaying the timing of ERK activity peaks across the cell cycle.  
 364 Lavender horizontal bands extend from birth to division of single cells, dark vertical bars represent peaks. Single  
 365 cell tracks begin immediately after a cell division event and are plotted relative to absolute experimental time. **E.**

366 *Schematic representation of expectations for a reduction of pulsing activity due to cell cycle (top) and due to*  
367 *changing experimental conditions (bottom) in the 2-dimensional color-encoded pulse rate map. F. Pulse rate map*  
368 *for the data shown in D. Time is discretized into 70 min bins. G. Coarse grained pulse rate map showing average*  
369 *pulse rate and its estimated error with 420 min binning.*

---

370

## 371 Discussion

372 Here we report fast pulses of ERK activity in mouse embryonic stem cells under a continuous  
373 stimulation regime. We demonstrate that this pulsing activity is consistent with oscillations,  
374 with transitions between silent and oscillatory states in single cells. Oscillations are driven by  
375 FGF4. Across a range of FGF4 ligand concentrations, we find oscillations with similar  
376 individual pulse durations. With increasing FGF4 concentrations, the distribution of interpulse  
377 intervals becomes narrower and the fraction of consecutive pulses increases, suggesting more  
378 regular oscillations.

379

380 The detection of signal-dependent ERK activity dynamics on short time scales in ESCs was  
381 made possible by combining the KTR sensor with high time-resolution recordings. A previous  
382 study which examined ERK dynamics upon acute stimulation focused on long term activity  
383 and did not resolve the short-timescale oscillations that we report here (Deathridge et al.,  
384 2019). These previously undetected dynamics have a modal interpulse interval of  
385 approximately 7 minutes (that is, about 8 pulses per hour), and are thus much faster than in  
386 any other cell system described so far.

387

388 Both paracrine and recombinant FGF4 stimulation of ESCs trigger oscillatory ERK activity with  
389 similar timescales of pulse duration and IPI, indicating that oscillations emerge in the  
390 intracellular signal transduction network, similar to the situation in other cell lines (Sparta et  
391 al., 2015). The short frequencies of ERK oscillations in ESCs further support the notion that  
392 they are driven by short-timescale delayed feedbacks such as post-translational modifications  
393 at the receptor level (Sparta et al., 2015), or at various levels within the MAPK cascade (Lake  
394 et al., 2016; Lemmon et al., 2016).

395

396 Pulsatile ERK activity in single cells upon continuous stimulation of RTKs has been reported  
397 in many cell types (Albeck et al., 2013; Goglia et al., 2020; Shankaran et al., 2009), indicating  
398 that the tendency to generate time-varying ERK activity patterns is a general feature of RTK  
399 signal transduction. In addition to the timescales, the dynamic signatures of FGF-triggered  
400 ERK pulses in ESCs however differ markedly from those observed in most other contexts.

401

402 ERK pulses in ESCs have well-defined durations and narrowly distributed IPs, consistent with  
403 oscillations. This is in contrast to the more irregular, stochastic pulsing reported in several  
404 immortalized cell lines and keratinocytes (Albeck et al., 2013; Aoki et al., 2013; Goglia et al.,  
405 2020). Regular oscillations of ERK nuclear import and export have been reported in mammary  
406 epithelial cells (Shankaran et al., 2009). In these cells, the frequency of ERK oscillations is  
407 insensitive to ligand levels over a wide range (Shankaran et al., 2009), similar to what we find  
408 upon titrating FGF4 in ESCs. Remarkably, across a wide range of ligand levels ESC  
409 populations contain a mixture of oscillating and non-oscillating cells as well as cells that  
410 transition between these regimes. This suggests that the FGF/ERK signal transduction system  
411 in ESCs is organized in the vicinity of a transition point between a non-oscillatory and  
412 oscillatory state. In this framework, increasing FGF4 levels would bring the system closer to  
413 this point. Similarly, the decay of ERK pulsing across the cell cycle can be interpreted as cells  
414 shifting away from the oscillatory to a non-oscillatory state, possibly through changes in the  
415 surface-to-volume ratio or cell cycle-dependent expression of components of the FGF/ERK  
416 signaling system. Such positioning close to a transition between oscillatory and non-oscillatory  
417 behavior has been described in hair cells of the cochlea (Camalet et al., 2000; Eguíluz et al.,  
418 2000), the actin system of *Dictyostelium* (Westendorf et al., 2013), and isolated cells of the  
419 growing vertebrate body axis (Webb et al., 2016), suggesting that this is a generic principle.  
420 The mechanism that positions the FGF/ERK signaling system in ESCs close to this transition  
421 point, the molecules involved, and the possible physiological relevance of being close to this  
422 transition, remain to be identified.

423

424 In cell systems that show stochastic ERK pulsing, increasing ligand levels leads to shorter  
425 interpulse intervals and hence to an increase in pulse rate (Albeck et al., 2013). This has been  
426 interpreted as frequency-modulated (FM) encoding of ligand concentration. In ESCs, the mode  
427 of the interpulse intervals is largely independent from FGF4 concentration, and pulse rate in  
428 the population increases mostly as a consequence of an increase in the fraction of time that  
429 individual cells spend pulsing. Thus, the FM-encoding model proposed for stochastic ERK  
430 pulsing is unlikely to apply in differentiating ESCs.

431

432 Still, the signalling dynamics that we report here reflect the cell type-specific organization of  
433 the FGF/ERK system in ESCs. While single cell models for FM-encoding are based on  
434 excitable dynamics arising from a combination of positive and negative feedback loops (Aoki  
435 et al., 2013; Tsai et al., 2008), oscillations with regular interpulse intervals require delayed  
436 negative feedback only (Novák and Tyson, 2008). Frequency-modulated ERK pulses are often

437 found downstream of the EGF receptor, for which autocatalysis provides a positive feedback  
438 mechanism (Koseska and Bastiaens, 2020). Positive feedback might be less prominent for  
439 the FGF receptor in ESCs, such that ERK dynamics is dominantly shaped by negative  
440 feedback. Negative feedback in the RAF-MEK-ERK cascade sets the ligand dose response  
441 range, and linearizes signal transduction despite non-linear signal amplification (Sturm et al.,  
442 2010). In ESCs and cells of the early embryo, the proportion of differentiated cell types  
443 smoothly depends on FGF4 concentration (Krawchuk et al., 2013; Raina et al., 2020). The  
444 oscillatory ERK activity that we detect here might be a consequence of negative feedback  
445 mechanisms that have evolved to tune the response range of the signal transduction system  
446 to the physiologically relevant range of paracrine FGF4 concentration, and faithfully transmit  
447 this information to the transcriptional level. Interfering with candidate mechanisms for negative  
448 feedback will be required to establish the connections between network architecture,  
449 oscillations, and cell differentiation.

450

451 Our identification of heterogeneous signaling dynamics adds another dimension to the  
452 phenomenon of cellular heterogeneity which is a hallmark of embryonic stem cell cultures in  
453 vitro (Canham et al., 2010; Chambers et al., 2007; Hayashi et al., 2008; Singh et al., 2007;  
454 Toyooka et al., 2008). Consistent with the well-known increase in cellular heterogeneity in  
455 serum + LIF (Kalkan and Smith, 2014), we observe a broader distribution of IPI in this culture  
456 condition compared to defined conditions. Heterogeneities in stem cell cultures have  
457 classically been attributed to the noisy activity of gene regulatory networks that control cell  
458 state. Correlating signaling dynamics with the state of transcriptional networks over time will  
459 be required to discern how signaling heterogeneities are causally related to these  
460 transcriptional cell states.

461

## 462 Acknowledgements

463 We thank Michelle Protzek and Holger Vogel for technical support, and Philippe Bastiaens  
464 and Heinz Neumann for suggestions and input at early stages of the project. We thank Aneta  
465 Koseska, Koichiro Uriu, John Albeck, Alfonso Martinez Arias and members of our groups for  
466 helpful suggestions on earlier versions of this manuscript. FF acknowledges funding from  
467 CONICET and DAAD, and the hospitality of the Department of Systemic Cell Biology. LM  
468 acknowledges funding from ANPCyT PICT 2017 3753. Work in our groups is supported by  
469 FOCEM-Mercosur (COF 03/11) and the Max Planck Society.

470



471

## 472 **Methods**

473

### 474 **Cell culture**

475 mESCs were routinely cultured on 0.1% gelatin (Sigma Aldrich)-coated tissue culture flasks in  
476 serum + LIF medium composed of GMEM (ThermoFisher), 10% batch-tested fetal bovine  
477 serum (FBS) (Sigma Aldrich), 1x GlutaMAX (ThermoFisher), 1 mM sodium pyruvate  
478 (ThermoFisher), 1x non-essential amino acids solution (ThermoFisher), 100  $\mu$ M 2-  
479 mercaptoethanol (ThermoFisher) and 10 ng/ml LIF (MPI protein expression facility). Cells  
480 were passaged every two to three days using 0.05% Trypsin (PAN Biotech). Basal medium  
481 for serum free culture was N2B27, prepared as a 1:1 mixture of DMEM/F12 (PAN Biotech)  
482 and Neuropan basal medium (PAN Biotech) with 0.5% BSA, 1x N2 and 1x B27 supplements  
483 (ThermoFisher) and 50  $\mu$ M 2-mercaptoethanol. For FGF stimulation experiments, short-term  
484 serum-free culture was carried out in N2B27 supplemented with 3  $\mu$ M CHIR99201 (Tocris), 1  
485  $\mu$ g/ml of Heparin (Sigma) and with or without 10 ng/ml LIF as indicated. Recombinant human  
486 FGF4 used was obtained from Peprotech. For live imaging and immunostaining studies, cells  
487 were seeded on polymer-bottomed ibidi  $\mu$ -slides (ibidi) coated with 20  $\mu$ g/ml fibronectin.

488

### 489 **Cell lines**

490 All KTR-expressing cell lines used in this study were derived from E14tg2a (Hooper et al.,  
491 1987). Targeting of the ERK-KTR-Clover construct into the *Hprt* locus has been described  
492 elsewhere (Simon et al., 2020). Mutagenesis of the *Fgf4* gene was performed by co-  
493 transfection of a CRISPR-construct and a repair template introducing a nonsense and a  
494 frameshift mutation as previously described (Morgani et al., 2018). Clones with the desired  
495 mutation were identified by restriction digest and Sanger sequencing of a PCR fragment  
496 encompassing the *Fgf4* start codon. Clonal cell lines were tested for their chromosome count  
497 using standard procedures (Nagy et al., 2008), and only cell lines with a modal count of  $n =$   
498 40 were used for analysis. *Fgf4*<sup>-/-</sup>, *Spry4*<sup>H2B-Venus/H2B-Venus</sup> cells to evaluate transcriptional  
499 activation downstream of recombinant FGF4 have been described (Morgani et al., 2018).

500

501

### 502 **Dual reporter experiments**

503 The ERK-KTR-mCherry construct for transient expression was prepared by first inserting the  
504 coding sequence for ERK-KTR (Regot et al., 2014) into a CMV-driven mCitrine C1 expression  
505 vector (TaKaRa), and then replacing the fluorophore for mCherry. The plasmid for transient

506 expression of EKAREV-NLS has been described (Komatsu et al., 2011). 1.5 µg each of  
507 plasmid were transiently transfected into E14tg2A mouse stem cells using Lipofectamine 2000  
508 (ThermoFisher) in suspension according to manufacturer's instructions. Cells were plated on  
509 fibronectin-coated ibidi slides and imaged 24h after transfection.

510

### 511 **Western blotting**

512 Cells were grown to confluency on fibronectin-coated tissue culture dishes and exposed to  
513 indicated experimental conditions. Cells were briefly washed twice with ice-cold PBS  
514 supplemented with 1 mM activated sodium orthovanadate and then lysed using commercially  
515 available lysis buffer (Cell Signaling) supplemented with benzonase (ThermoFisher),  
516 phosphatase inhibitor cocktail 2 and 3 (Sigma), and cOmplete EDTA-free protease inhibitor  
517 cocktail (Roche). Lysates were snap-frozen in liquid nitrogen. Protein concentration was  
518 estimated using a micro-BCA assay (ThermoFisher), and lysates were denatured by adding  
519 appropriate amounts of 5x Laemelli buffer and boiling for 5 min. 10 or 20 µg protein was loaded  
520 across all wells in any given gel. Bis-Tris SDS gels were run with 1x MOPS buffer  
521 (ThermoFisher) with fresh sodium bisulfite, and subsequently transferred onto methanol-  
522 activated PVDF membranes (Millipore) at 40 V for 1.5 h with the NuPage transfer system  
523 (ThermoFisher). Primary antibodies used were anti-Tubulin 1:5000 (T6074, Sigma), anti-  
524 pERK1/2 1:1000 (4370S, Cell Signaling), and anti-total ERK1/2 1:1000 (ab36991, Abcam)  
525 along with appropriate secondary antibodies (LI-COR). Bands were detected using the  
526 Odyssey CLx imaging system (LI-COR). Bands were quantified using FIJI/ImageJ (Rueden et  
527 al., 2017). For quantification of pERK and total ERK, integrated intensity in both ERK1 and  
528 ERK2 bands was added.

529

### 530 **Immunostaining**

531 For pERK immunostaining, cells were fixed for 15 min at 37°C by diluting fixative stocks  
532 directly into cell culture medium to a final concentration of 4% PFA and 0.01% glutaraldehyde  
533 (Sigma). After a brief wash with PBS, cells were permeabilized with 100% methanol at -20°C.  
534 For all other antibodies, fixation was performed with 4% PFA at room temperature for 20 min.  
535 Cells were washed with PBS and then simultaneously blocked and permeabilized with 5%  
536 normal goat serum (ThermoFisher) in 0.5% Triton X-100 (Serva) in PBS for 60 min. Antibody  
537 staining was carried out overnight at 4°C in PBS + 0.1% Triton X-100 and 1% BSA (Sigma).  
538 Primary antibodies used were anti-pERK1/2 1:200 (4370S, Cell Signaling), anti-E-Cad 1:200  
539 (M108, clone ECCD-2, TaKaRa), anti-Nanog 1:200 (eBIO-MLC51), anti-POU5F1 1:200 (C-  
540 10, sc-5279, Santa Cruz), along with appropriate secondary antibodies. Hoechst 33342 was  
541 used at 1µg/ml to counter-stain nuclei, and CellMaskRed (ThermoFisher) was used to label

542 membranes according to manufacturer's instructions. After staining, samples were covered  
543 with 200  $\mu$ l of antifade composed of 80% w/v glycerol with 4% w/v N-propyl gallate and stored  
544 at 4°C. Images were analyzed using custom scripts in MATLAB (The Mathworks) and  
545 Fiji/ImageJ for the detection of nuclei as well as an active-contours based identification of  
546 membranes.

547

### 548 **Flow cytometry**

549 Cells were grown on fibronectin-coated dishes in N2B27 supplemented with 3  $\mu$ M CHIR99201,  
550 1  $\mu$ M PD0325901 and 10 ng/ml LIF (2i + LIF) for 3 days. For stimulation, cells were washed  
551 2x with PBS, and FGF4 was added at indicated concentrations in serum-free N2B27 medium  
552 supplemented with 3  $\mu$ M CHIR99201 and 1 mg/ml Heparin for 24 h. Cells were then  
553 trypsinized and fixation was performed in suspension with 4% paraformaldehyde at room  
554 temperature for 15 min. After a brief wash in PBS, cells were resuspended in PBS + 1% BSA  
555 and analyzed on a BD-LSR II (BD Biosciences) flow cytometer. Data was analyzed in FlowJo  
556 (BD Biosciences).

557

### 558 **Live cell imaging and cell tracking**

559 ERK-KTR expressing cells were cultured on ibidi  $\mu$ -slides, and imaged on a Leica SP8  
560 confocal microscope equipped with an incubation chamber and CO<sub>2</sub> supply to maintain  
561 temperature at 37°C, CO<sub>2</sub> at 5%, and relative humidity at 80%. 4 h before acquisition, live-cell  
562 nuclear dye SiR-Hoechst 652/674 (Spirochrome) was added to facilitate tracking of cells. SiR-  
563 Hoechst was added at a final concentration of 500 nM for short-term time-lapse experiments,  
564 and 250nM for long-term time-lapse experiments. Fluorophores were excited with a 504nm  
565 line from a white-light laser (Leica), and images of the KTR-Clover and the nuclear marker  
566 were simultaneously captured through a 63x 1.4 N.A. oil objective. For short-term (~2 h)  
567 imaging experiments, single frames were acquired once every 20 s, with an XY resolution of  
568 0.251 nm, with a pixel dwell time of 2.6  $\mu$ s, and a pinhole of 2.4 airy units. For long term (~19  
569 h) imaging experiments, to minimize overall light exposure single frames were acquired once  
570 every 105 s, with an XY resolution of 0.401 nm, with a pixel dwell time of 3.1  $\mu$ s, and a pinhole  
571 of 2.6 airy units. Images were processed with custom MATLAB scripts to enhance contrast  
572 and highlight nuclei to facilitate automatic tracking. Tracking was performed using the  
573 Trackmate plugin (Tinevez et al., 2017) for FIJI/ImageJ. Tracking was initially performed  
574 automatically for the entire colony, and tracks were subsequently manually curated frame-by-  
575 frame by removing any cells that did not display a typical ESC morphology with a small  
576 cytoplasm and round, well-defined nuclei. We also removed cells that left the field of view, and  
577 adjusted tracking in individual frames for incorrectly identified nuclei. We inverted fluorescence

578 values to obtain the negative image, and then measured mean fluorescence intensities in a  
579 region of interest (ROI) of variable size within each tracked nucleus. In these KTR signal  
580 traces, low intensity values correspond to low ERK activity and high intensity values indicate  
581 high ERK activity. For the short-term imaging, tracks started at the beginning of the movie and  
582 extended until the end of the movie, or until cell division. As the long-term imaging experiments  
583 were designed to capture the entire cell cycle, tracks started in the first frame following cell  
584 division where a cell could be tracked, and ended at cell division. In these experiments, we  
585 kept tracks of cells that left the field of view, but only if they were observed for longer than  
586 4.5 h.

587

### 588 **Time series preprocessing**

589 We screened and corrected time series for tracking errors, such as ROIs placed partially  
590 outside the nucleus or overlapping with a nucleolus. Because these structures have  
591 fluorescence intensities that usually differ from that of the nucleoplasm, these tracking errors  
592 usually led to an increase in the variance of the pixel intensity across the ROI. We screened  
593 time series for high variance regions, checked the tracking for all instances where the variance  
594 crossed a manually set threshold value, and corrected the tracking if this was required.

595

596 Just before cell division, the sensor was excluded from the nucleus, resulting in a pulse of the  
597 KTR signal at the end of dividing cells tracks (for example cells 30, 31, 41 and 50 in the serum  
598 + LIF condition without MEKi (Fig. 1 Supp. 2)). As this pulse of reporter exclusion was  
599 insensitive to MEK inhibition, it is unlikely reporting ERK activity and we therefore decided to  
600 trim these events from all traces. While most cells divided in the long-term measurements,  
601 only a few did it in short-term measurements. Correspondingly, in short-term measurements  
602 we deleted the last 20 frames (about 7 min) of the time series of dividing cells only. In the long-  
603 term measurements, where most cells divided, we discarded the last 15 frames (20.25 min)  
604 of each time series.

605

### 606 **Analysis of ERK dynamics in short-term high resolution datasets**

607

#### 608 **Pulse recognition**

609 We defined a pulse as a local maximum between two local minima, imposing two conditions:  
610 (i) we required amplitude to be larger than a threshold amplitude  $A_{th}$ , and (ii) slope to be larger  
611 than a threshold slope  $v_{th}$ . The amplitude and slope thresholds are free parameters of the  
612 algorithm. These free parameters were set through a quantitative threshold analysis protocol  
613 described below and were specific for each dataset (Supp. Table T1).

614

615 To remove high frequency noise that interfered with the performance of the pulse detection  
616 algorithm, we first smoothed the time series (Fig. 2 Supp. 1, Fig. 3 Supp. 3). We filtered the  
617 highest frequencies in the data using a moving average window of 3 frames of duration. That  
618 is, for each KTR signal value  $x_i$  of the time series, we computed the average value

619

$$620 \hat{x}_i = \frac{1}{3}(x_{i-1} + x_i + x_{i+1}),$$

621

622 where  $i$  is the frame number. At the boundaries we considered average windows of 2 and 1  
623 frames. Note that detrending was not required in the case of this data.

624

625 We first searched the time series for all the local maxima and minima. We compared each  
626 value  $\hat{x}_i$  of the time series with its immediate neighbours  $\hat{x}_{i-1}$  and  $\hat{x}_{i+1}$ . The initial value  $\hat{x}_0$  was  
627 compared only with the next value  $\hat{x}_1$ , and the last value  $\hat{x}_n$  with the previous one  $\hat{x}_{n-1}$  (Fig. 2  
628 Supp. 1, Fig. 3 Supp. 3). We discarded the first maximum if there was no minimum on its left,  
629 and the last maximum if there was no minimum on its right. In this way we defined a subset of  
630 data points consisting of the maxima  $M = \{j \mid \hat{x}_j > \hat{x}_{j\pm 1}\}$ , and the subset of minima  $m =$   
631  $\{j \mid \hat{x}_j < \hat{x}_{j\pm 1}\}$ . From the definition, it follows that the minimum distance  $|i - j|$  between two  
632 maxima  $\hat{x}_i, \hat{x}_j \in M$  is 2 frames, and the minimum distance  $|k - l|$  between two minima  $\hat{x}_k,$   
633  $\hat{x}_l \in m$  is 2 frames.

634

635 To identify pulses from this set of maxima we applied two filters, one for pulse amplitude and  
636 another one for pulse slope. To implement the pulse amplitude and pulse slope filters we  
637 considered each maximum of the time series, from left to right. For each maximum  $j \in M$  of  
638  $\hat{x}_j$ , we searched for the first minimum to its left  $k \in m$  such that the resulting left amplitude  
639  $A_j^{left} = \hat{x}_j - \hat{x}_k$  was larger than the amplitude threshold  $A_j^{left} \geq A_{th}$  and the left slope was  
640 larger than the slope threshold  $v_j^{left} \geq v_{th}$  (see threshold analysis protocol below). The left  
641 slope was defined as  $v_j^{left} = A_j^{left} / dt_j^{left}$ , where  $dt_j^{left} = j - k$  is the left pulse duration.  
642 Similarly, we searched the first minimum to the right that verified  $A_j^{right} \geq A_{th}$  and  $v_j^{right} \geq v_{th}$ .  
643 We next removed overlapping pulse candidates: if the right minimum of the first pulse occurred  
644 later than this new left minimum of the second one, we discarded the pulse that had the smaller  
645 amplitude  $(A_i^{left} + A_i^{right})/2$  (Fig. 2 Supp. 1, Fig. 3 Supp. 3).

651

## 652 **Threshold analysis protocol**

653 Pulse recognition depends on the free parameters for amplitude threshold  $A_{th}$  and slope  
654 threshold  $v_{th}$ . To rationally set values for these two threshold parameters, we first focused on  
655 the negative control condition for each respective experiment, where ERK pulsing was  
656 minimal. We determined parameter combinations for which a fixed, low number of pulses was  
657 detected in the negative control, and then selected specific parameter values that maximized  
658 the number of pulses recognized in the experimental condition where ERK was most active  
659 (Supp. Table T1).

660

661 We started by establishing a two-dimensional exploratory parameter space for each dataset  
662 (Supp. Table T1). For each combination of parameters  $(A_{th}^m, v_{th}^n)$  on the exploratory parameter  
663 space, we run the pulse detection algorithm described in the previous section for the negative  
664 control and computed the averaged pulse rate

665

$$666 \delta_p = \frac{1}{N} \sum_{j=1}^N \frac{n_j}{L_j},$$

667

668 where  $N$  is the total number of cells in the negative control,  $n_j$  is the number of detected pulses  
669 for cell  $j$  and  $L_j$  is the length of the time series (Fig. 2 Supp. 1). We then introduced exploratory  
670 level curves across the parameter space by fixing average pulse rate values  $\delta_p = \delta_p^*$  in the  
671 negative control (Supp. Table T1). This restricted parameter combinations to curves in the  
672 exploratory parameter space (Fig. 2 Supp. 1, Fig. 3 Supp. 3). Next, for each  $(A_{th}^{m_k}, v_{th}^{n_k})$   
673 combination on each exploratory level curve  $k$ , we applied the pulse recognition algorithm on  
674 the experimental condition where ERK was most active. The plot of pulse rate along this level  
675 curve showed a flat region of similarly high pulse detection. Within this region, we chose  
676 parameters pairs that filtered out spurious pulses that were flat and long from the negative  
677 control. This resulted in a pair of parameters  $(A_{th}, v_{th})$  specific for each experiment (Fig. 2  
678 Supp. 1, Fig. 3 Supp. 3, Supp. Table T1).

679

## 680 **Quantitative pulse dynamics characterization**

681 To characterize dynamical activity of the time series, we introduced a set of quantitative  
682 measures (Fig. 2D). For each pulse  $P_i$  in the set of pulses  $P = \{P_j = (j, k_j, l_j) \mid P_j \text{ is a pulse}\}$   
683 we defined the **pulse amplitude**  $A_i$  as the average of its right and left amplitudes

684

$$685 A_i = \frac{1}{2}(A_i^{left} + A_i^{right}).$$

686

687 **Pulse duration**  $dt_i$  was defined as the distance between the two minima that define the pulse

688

$$689 \quad dt_i = dt_i^{left} + dt_i^{right},$$

690

691 and the **joint pulse duration**  $dt_{i,j}$  between a pair of successive pulses  $P_i, P_j$  with  $j > i$ , as the

692 sum of the right pulse duration of the earlier pulse  $i$  and the left pulse duration of the later

693 pulse  $j$

694

$$695 \quad dt_{i,j} = dt_i^{right} + dt_j^{left}.$$

696

697 We computed the **interpulse interval**  $IPI_{i,j}$  between a pair of successive pulses  $P_i, P_j$  with

698  $j > i$ , as the time interval between their maxima

699

$$700 \quad IPI_{i,j} = j - i.$$

701

702 The **silent interval**  $dm_{i,j}$  between a pair of successive pulses  $P_i, P_j$  was defined as the time

703 elapsed between the right minimum of the earlier pulse  $P_i$  and the left minimum of the later

704 pulse  $P_j$ , that is

705

$$706 \quad dm_{i,j} = k_j - l_i.$$

707

708 Note that calculating these last three quantities requires a trace with at least two pulses. These

709 quantities satisfy the relationship

710

$$711 \quad dm_{i,j} = IPI_{i,j} - dt_{i,j}.$$

712

713 The values that these quantitative measures can take are constrained by the resolution

714 imposed by pulse recognition. The minimum distance  $|i - j|$  between two maxima  $\hat{x}_i, \hat{x}_j \in M$

715 was previously set to 2 frames. Thus, the distance between maxima of pulses  $P_k, P_l \in P$

716 verifies  $|k - l| \geq 2$  frames, and in particular  $IPI_{k,l} \geq 2$  frames for any pair of consecutive pulses

717  $P_k, P_l \in P$ . Similarly, the minimum distance  $|i - j|$  between two minima  $\hat{x}_i, \hat{x}_j \in m$  is 2 frames.

718 Consequently, given a pulse  $P_j = (j, k_j, l_j) \in P$ , the distance between the two minima that

719 defines the pulse  $dm_j = k_j - l_j$  satisfies  $dm_j \geq 2$  frames. Finally, from the previous section  
720 we have the constraints  $A_i > A_{th}$  and  $v_i > v_{th}$ .

721

722 We classified pulses as **consecutive** or **isolated**. Inspection of the raw data indicated that  
723 pulse duration was more variable between cells in the same condition than within a cell. For  
724 this reason, we made the criterion for consecutiveness dependent on joint duration of the half-  
725 pulses that flank an intervening silent period. Specifically, we established that a pair of  
726 successive pulses  $P_i, P_j$  are **consecutive pulses** if the silent interval between them  $dm_{i,j}$  is  
727 shorter than half of their joint duration  $dt_{i,j}$ , that is  $P_i, P_j$  are consecutive if  $dm_{i,j} \leq 0.5 dt_{i,j}$ .  
728 Pulses that do not belong to a consecutive pair are **isolated pulses**.

729

730 We also introduced a quantitative measure to characterize the dynamical activity on a  
731 population level. Given a single cell  $c$  associated to a time series of total length  $T$  and  $n$  pulses,  
732 the **pulsing** measure  $A_c$  is defined as the proportion of time that a single cell is pulsing

733

$$734 A_c = \frac{1}{T} \sum_{i=1}^n dt_i.$$

735

### 736 **Kolmogorov-Smirnov test and notation**

737 We implemented the Kolmogorov-Smirnov two sample test (Frodesen et al., 1979) available  
738 on the **stats** module of the **Scipy** package from Python (Virtanen et al., 2020). The  
739 aggregated data for all quantities considered is summarized in (Supp. Table T2).

740

741

---

### 742 **Analysis of ERK dynamics in long-term datasets**

743 Long-term recordings to map ERK dynamics across the cell cycle were about 12.5 times  
744 longer and had a sampling rate reduced to about 1/5 compared to the short-term recordings  
745 (Fig. 4 Supp. 1). These qualitative differences of these data prompted for a different analysis  
746 strategy. Due to this limited time resolution, we decided to exclusively focus on the occurrence  
747 and timing of ERK pulses in the long-term datasets, and hence refer to these features as  
748 peaks.

749

### 750 **Peak detection**

751 The long-term recordings data featured both low and high frequency fluctuations. Low  
752 frequency noise created variable trends that impeded direct comparison between traces, while



753 high frequency noise could hinder the identification of activity pulses. We used two different  
754 filtering strategies to remove fluctuations: (i) a baseline filtering that removed only low  
755 frequencies, and (ii) a band-pass filter that removed both low and high frequencies. Both  
756 methods produced similar statistics after peak detection.

757

758 In the first strategy we flattened the baseline of each trace by subtracting a low degree  
759 polynomial that follows its minima (Fig. 4 Supp. 2). To obtain this polynomial, we first identified  
760 all the local minima on each time series. We compared each value  $x_i$  of the time series with  
761 its **two** neighbors to the left  $x_{i-1}$  and  $x_{i-2}$ , and to the right  $x_{i+1}$  and  $x_{i+2}$ . The value  $x_1$  was  
762 compared with its two right neighbors and  $x_0$  to the left, and  $x_{n-1}$  with its two left neighbors  
763 and  $x_n$  to the right. We used the least squares method to fit a polynomial to the minima  
764 together with the endpoints of the trace (**numpy** (Harris et al., 2020)). Due to the variability in  
765 the traces duration and baseline, we set a trace specific polynomial degree  $deg$  to allow an  
766 accurate fit of the baseline while avoiding overfitting, with  $deg_j = (2 + m_j)/3$ , where  $m_j$  is the  
767 number of minima in trace  $j$ .

768

769 In the second strategy, we filtered the signal by removing unwanted high and low frequencies  
770 with a band-pass filter (Fig. 4 Supp. 2). We applied a Butterworth filter with zero time and linear  
771 phase, by implementing the band-pass filter on a moving window both forward and backward  
772 in time (**scipy Signal** submodule (Virtanen et al., 2020)). We used an odd extension for the  
773 padded signal and a pad length of 15 frames, that is 3 times the number of coefficients of the  
774 Butterworth polynomials. The Butterworth filter is a band-pass square filter: it has a flat  
775 frequency response in the passband region, and rolls off towards zero in the stopband region.  
776 The order of the filter regulates the sharpness of the cutoff and we set it to 4. We chose the  
777 cutoff frequencies  $f_{low}$  and  $f_{high}$  in terms of the maximum frequency we can resolve with the  
778 given sampling rate. We chose low and high stopband frequencies in terms of the Nyquist  
779 frequency,  $f_{low} = 0.025 f_{nyq}$  and  $f_{high} = 0.6 f_{nyq}$ , with  $f_{nyq} = 0.5 f_s = (1/210)$  Hz for a  
780 sampling frequency  $f_s = (1/105)$  Hz.

781

782 We determined the local maxima by comparison of neighboring values. We compared each  
783 value  $\hat{x}_i$  of the time series with its neighbours  $[\hat{x}_{i-\delta}, \hat{x}_{i-1}]$  and  $[\hat{x}_{i+1}, \hat{x}_{\delta+1}]$ , where  $\delta$  is a free  
784 parameter of the method that determines the minimum time interval between peaks that we  
785 could resolve. We reduced the range of comparison until reaching  $[\hat{x}_1, \hat{x}_\delta]$  for the initial value  
786  $\hat{x}_0$ , and  $[\hat{x}_{n-\delta}, \hat{x}_{n-1}]$  for the final value  $\hat{x}_n$ . We set  $\delta = 2$  frames, which allowed us to resolve  
787 ERK-dependent peaks that are at least 3.5 minutes apart.

788

### 789 **Threshold analysis protocol**

790 To remove spurious low amplitude peaks, we filtered peaks with a KTR signal threshold value  
791  $I_{th}$ . We explored how the number of peaks changed in *Fgf4* mutant in N2B27 (negative control)  
792 and wild type cells growing in serum + LIF as we changed this threshold (Fig. 4 Supp. 2). We  
793 detected peaks in the two conditions for different  $I_{th}^i$  threshold values evenly spaced in the  
794 a.u. range [0, 30]. For each  $I_{th}^i$ , we computed the *total pulse rate*

795

$$796 \quad \delta^i = \sum_{j=1}^N \frac{n_j^i}{L_j},$$

797

798 where  $N$  is the total number of cells of each condition,  $n_j^i$  is the number of detected pulses for  
799 this threshold value  $I_{th}^i$  and  $L_j$  is the total length of the time series of cell  $j$ . We normalized  
800 pulse rate to the total pulse rate  $\delta^0$  at  $I_{th}^0 = 0$ ,  $\bar{\delta}^i = \delta^i / \delta^0$  (Fig. 4 Supp. 2). This normalized  
801 pulse rate decreased with increasing the threshold values both in the negative control and the  
802 wild type. The negative control pulse rate decays much faster, reaching 0.5 while wild type  
803 values are still around 0.9. Thus, wild type genuine peaks can be distinguished from the  
804 background fluctuations in the control. We set a threshold value  $I_{th}$  for which 1% of all the  
805 local maxima were classified as peaks in the negative control, that is  $\bar{\delta}^i = 0.01$ . This condition  
806 results in threshold values  $I_{th} = 24$  for the frequency filtering strategy and  $I_{th} = 25$  for baseline  
807 filtering strategy (Fig. 4 Supp. 2.). We chose the baseline filtering strategy to analyze the data  
808 shown in Fig. 4, Fig. 4 Supp. 1 and Fig. 4 Supp. 3.

809

### 810 **Error estimation in pulse rate maps**

811 Being  $\bar{v}_{j,k}$  the contribution of vector  $\bar{v}$  to  $(T_{b,j}, T_{e,k})$ , we interpreted each element of every  $\bar{v}_{j,k}$  as  
812 an individual experiment with two possible outcomes 1 (success) and 0 (failure). This  $T$   
813 independent experiments in  $(T_{b,j}, T_{e,k})$  had a characteristic probability of success  $p \in [0,1]$ .

814 Then, the probability of obtaining  $\hat{r}$  numbers of success in the  $T$  independent experiments in  
815  $(T_{b,j}, T_{e,k})$  is determined by the binomial distribution  $B(\hat{r}; T, p)$ .

816

817 We are interested on estimate the relative number of successes in  $T$  trials  $\bar{r} = \hat{r}/T$ . Then, the  
818 maximum likelihood estimator for  $\bar{r}$  is given by  $\bar{r} = r/T$  and its variance  $\sigma^2(\bar{r}) = \bar{r}(1 - \bar{r})/n$   
819 (Frodesen et al., 1979).

820

821 Understanding the  $T$  number of trials as a time interval, the maximum likelihood estimator of  
822 the relative number of successes is the previously defined pulse rate, that is number of peaks  
823 per unit time. Then, we estimated the pulse rate in each subspace  $(T_{b,j}, T_{e,k})$  (Fig. 4F, Fig. 4  
824 Supp. 3). The corresponding error was computed as the standard deviation in Fig. 4 Supp. 3.  
825 On this approach we assume stationarity conditions for each subspace  $(T_{b,j}, T_{e,k})$  by assuming  
826 a constant  $p$  in each case. We neglected small variations in  $p$  because we wanted to study  
827 the behavior of the previously characterized short-term dynamical activity ( $\sim 7$  min) in long-  
828 term cell cycle time scales ( $\sim 13$  h).

829

## 830 References:

- 831 Albeck JG, Mills GB, Brugge JS. 2013. Frequency-Modulated Pulses of ERK Activity  
832 Transmit Quantitative Proliferation Signals. *Mol Cell* **49**:249–261.  
833 doi:10.1016/j.molcel.2012.11.002
- 834 Antebi YE, Nandagopal N, Elowitz MB. 2017. An operational view of intercellular signaling  
835 pathways. *Curr Opin Syst Biol* **1**:16–24. doi:10.1016/j.coisb.2016.12.003
- 836 Aoki K, Kondo Y, Naoki H, Hiratsuka T, Itoh RE, Matsuda M. 2017. Propagating Wave of  
837 ERK Activation Orients Collective Cell Migration. *Dev Cell* **43**:305–317.e5.  
838 doi:10.1016/j.devcel.2017.10.016
- 839 Aoki K, Kumagai Y, Sakurai A, Komatsu N, Fujita Y, Shionyu C, Matsuda M. 2013.  
840 Stochastic ERK Activation Induced by Noise and Cell-to-Cell Propagation Regulates  
841 Cell Density-Dependent Proliferation. *Mol Cell* **52**:529–540.  
842 doi:10.1016/j.molcel.2013.09.015
- 843 Brewer JR, Mazot P, Soriano P. 2016. Genetic insights into the mechanisms of Fgf  
844 signaling. *Genes Dev* **30**:751–771. doi:10.1101/gad.277137.115
- 845 Camalet S, Duke T, Julicher F, Prost J. 2000. Auditory sensitivity provided by self-tuned  
846 critical oscillations of hair cells. *Proc Natl Acad Sci* **97**:3183–3188.  
847 doi:10.1073/pnas.97.7.3183
- 848 Canham MA, Sharov AA, Ko MSH, Brickman JM. 2010. Functional heterogeneity of  
849 embryonic stem cells revealed through translational amplification of an early  
850 endodermal transcript. *PLoS Biol* **8**:e1000379. doi:10.1371/journal.pbio.1000379
- 851 Chambers I, Silva J, Colby D, Nichols J, Nijmeijer B, Robertson M, Vrana J, Jones K,  
852 Grotewold L, Smith A. 2007. Nanog safeguards pluripotency and mediates germline  
853 development. *Nature* **450**:1230–1234. doi:10.1038/nature06403
- 854 de la Cova C, Townley R, Regot S, Greenwald I. 2017. A Real-Time Biosensor for ERK  
855 Activity Reveals Signaling Dynamics during *C. elegans* Cell Fate Specification. *Dev Cell*  
856 **42**:542–553.e4. doi:10.1016/j.devcel.2017.07.014
- 857 Deathridge J, Antolović V, Parsons M, Chubb JR. 2019. Live imaging of ERK signalling  
858 dynamics in differentiating mouse embryonic stem cells. *Development* **146**:dev172940.  
859 doi:10.1242/dev.172940
- 860 Eguíluz VM, Ospeck M, Choe Y, Hudspeth AJ, Magnasco MO. 2000. Essential nonlinearities  
861 in hearing. *Phys Rev Lett* **84**:5232–5235. doi:10.1103/PhysRevLett.84.5232
- 862 Frodesen AG, Skjeggstad O, Tofte H. 1979. Probability and Statistics in Particle Physics.  
863 Universitetsforlaget.
- 864 Goglia AG, Wilson MZ, Jena SG, Silbert J, Basta LP, Devenport D, Toettcher JE. 2020. A  
865 Live-Cell Screen for Altered Erk Dynamics Reveals Principles of Proliferative Control.  
866 *Cell Syst* **10**:240–253.e6. doi:10.1016/j.cels.2020.02.005
- 867 Hamilton WB, Mosesson Y, Monteiro RS, Emdal KB, Knudsen TE, Francavilla C, Barkai N,  
868 Olsen J V., Brickman JM. 2019. Dynamic lineage priming is driven via direct enhancer  
869 regulation by ERK. *Nature* **575**:355–360. doi:10.1038/s41586-019-1732-z
- 870 Harris CR, Millman KJ, van der Walt SJ, Gommers R, Virtanen P, Cournapeau D, Wieser E,  
871 Taylor J, Berg S, Smith NJ, Kern R, Picus M, Hoyer S, van Kerkwijk MH, Brett M,  
872 Haldane A, del Río JF, Wiebe M, Peterson P, Gérard-Marchant P, Sheppard K, Reddy  
873 T, Weckesser W, Abbasi H, Gohlke C, Oliphant TE. 2020. Array programming with  
874 NumPy. *Nature* **585**:357–362. doi:10.1038/s41586-020-2649-2
- 875 Hayashi K, Lopes SMC de S, Tang F, Surani MA. 2008. Dynamic Equilibrium and  
876 Heterogeneity of Mouse Pluripotent Stem Cells with Distinct Functional and Epigenetic  
877 States. *Cell Stem Cell* **3**:391–401. doi:10.1016/j.stem.2008.07.027
- 878 Hiratsuka T, Fujita Y, Naoki H, Aoki K, Kamioka Y, Matsuda M. 2015. Intercellular  
879 propagation of extracellular signal-regulated kinase activation revealed by in vivo  
880 imaging of mouse skin. *Elife* **4**:e05178. doi:10.7554/eLife.05178
- 881 Hooper M, Hardy K, Handyside A, Hunter S, Monk M. 1987. HPRT-deficient (Lesch–Nyhan)  
882 mouse embryos derived from germline colonization by cultured cells. *Nature* **326**:292–

- 883 295. doi:10.1038/326292a0
- 884 Kalkan T, Smith A. 2014. Mapping the route from naive pluripotency to lineage specification.
- 885 *Philos Trans R Soc B Biol Sci* **369**:20130540. doi:10.1098/rstb.2013.0540
- 886 Kang M, Garg V, Hadjantonakis A-K. 2017. Lineage Establishment and Progression within
- 887 the Inner Cell Mass of the Mouse Blastocyst Requires FGFR1 and FGFR2. *Dev Cell*
- 888 **41**:496-510.e5. doi:10.1016/j.devcel.2017.05.003
- 889 Kang M, Piliszek A, Artus J, Hadjantonakis A-K. 2013. FGF4 is required for lineage
- 890 restriction and salt-and-pepper distribution of primitive endoderm factors but not their
- 891 initial expression in the mouse. *Development* **140**:267–79. doi:10.1242/dev.084996
- 892 Komatsu N, Aoki K, Yamada M, Yukinaga H, Fujita Y, Kamioka Y, Matsuda M. 2011.
- 893 Development of an optimized backbone of FRET biosensors for kinases and GTPases.
- 894 *Mol Biol Cell* **22**:4647–4656. doi:10.1091/mbc.e11-01-0072
- 895 Koseska A, Bastiaens PI. 2017. Cell signaling as a cognitive process. *EMBO J* **36**:568–582.
- 896 doi:10.15252/embj.201695383
- 897 Koseska A, Bastiaens PIH. 2020. Processing Temporal Growth Factor Patterns by an
- 898 Epidermal Growth Factor Receptor Network Dynamically Established in Space. *Annu*
- 899 *Rev Cell Dev Biol.* **36**:359-383 doi:10.1146/annurev-cellbio-013020-103810
- 900 Krawchuk D, Honma-Yamanaka N, Anani S, Yamanaka Y. 2013. FGF4 is a limiting factor
- 901 controlling the proportions of primitive endoderm and epiblast in the ICM of the mouse
- 902 blastocyst. *Dev Biol* **384**:65–71. doi:10.1016/j.ydbio.2013.09.023
- 903 Kunath T, Saba-EI-Leil MK, Almousailleakh M, Wray J, Meloche S, Smith A. 2007. FGF
- 904 stimulation of the Erk1/2 signalling cascade triggers transition of pluripotent embryonic
- 905 stem cells from self-renewal to lineage commitment. *Development* **134**:2895–902.
- 906 doi:10.1242/dev.02880
- 907 Lake D, Corrêa SAL, Müller J. 2016. Negative feedback regulation of the ERK1/2 MAPK
- 908 pathway. *Cell Mol Life Sci* **73**:4397–4413. doi:10.1007/s00018-016-2297-8
- 909 Lemmon MA, Freed DM, Schlessinger J, Kiyatkin A. 2016. The Dark Side of Cell Signaling:
- 910 Positive Roles for Negative Regulators. *Cell.* **164**:1172-1184
- 911 doi:10.1016/j.cell.2016.02.047
- 912 Mayr V, Sturtzel C, Stadler M, Grissenberger S, Distel M. 2018. Fast dynamic in vivo
- 913 monitoring of Erk activity at single cell resolution in DREKA zebrafish. *Front Cell Dev*
- 914 *Biol* **6**:111. doi:10.3389/fcell.2018.00111
- 915 Molotkov A, Mazot P, Brewer JR, Cinalli RM, Soriano P. 2017. Distinct Requirements for
- 916 FGFR1 and FGFR2 in Primitive Endoderm Development and Exit from Pluripotency.
- 917 *Dev Cell* **41**:511-526.e4. doi:10.1016/j.devcel.2017.05.004
- 918 Morgani SM, Saiz N, Garg V, Raina D, Simon CS, Kang M, Arias AM, Nichols J, Schröter C,
- 919 Hadjantonakis A-K. 2018. A Sprouty4 reporter to monitor FGF/ERK signaling activity in
- 920 ESCs and mice. *Dev Biol* **441**:104–126. doi:10.1016/j.ydbio.2018.06.017
- 921 Nagy A, Gertsenstein M, Vintersten K, Behringer R. 2008. Karyotyping Mouse Cells. *Cold*
- 922 *Spring Harb Protoc* **2008**:4706. doi:10.1101/pdb.prot4706
- 923 Novák B, Tyson JJ. 2008. Design principles of biochemical oscillators. *Nat Rev Mol Cell Biol*
- 924 **9**:981–991. doi:10.1038/nrm2530
- 925 Ohnishi Y, Huber W, Tsumura A, Kang M, Xenopoulos P, Kurimoto K, Oleś AK, Araújo-
- 926 Bravo MJ, Saitou M, Hadjantonakis A-K, Hiiragi T. 2014. Cell-to-cell expression
- 927 variability followed by signal reinforcement progressively segregates early mouse
- 928 lineages. *Nat Cell Biol* **16**:27–37. doi:10.1038/ncb2881
- 929 Pokrass MJ, Ryan KA, Xin T, Pielstick B, Timp W, Greco V, Regot S. 2020. Cell-Cycle-
- 930 Dependent ERK Signaling Dynamics Direct Fate Specification in the Mammalian
- 931 Preimplantation Embryo. *Dev Cell* **55**:328-340.e5. doi:10.1016/j.devcel.2020.09.013
- 932 Raina D, Stanoev A, Bahadori A, Protzek M, Koseska A, Schröter C. 2020. Cell-cell
- 933 communication through FGF4 generates and maintains robust proportions of
- 934 differentiated cell fates in embryonic stem cells. *bioRxiv.*
- 935 doi:10.1101/2020.02.14.949701
- 936 Regot S, Hughey JJ, Bajar BT, Carrasco S, Covert MW. 2014. High-Sensitivity
- 937 Measurements of Multiple Kinase Activities in Live Single Cells. *Cell* **157**:1724–1734.

- 938 doi:10.1016/j.cell.2014.04.039  
939 Rueden CT, Schindelin J, Hiner MC, DeZonia BE, Walter AE, Arena ET, Eliceiri KW. 2017.  
940 ImageJ2: ImageJ for the next generation of scientific image data. *BMC Bioinformatics*  
941 **18**:529. doi:10.1186/s12859-017-1934-z  
942 Santos SDM, Verveer PJ, Bastiaens PIH. 2007. Growth factor-induced MAPK network  
943 topology shapes Erk response determining PC-12 cell fate. *Nat Cell Biol* **9**:324–330.  
944 doi:10.1038/ncb1543  
945 Schröter C, Rue P, Mackenzie JP, Martinez Arias A. 2015. FGF/MAPK signaling sets the  
946 switching threshold of a bistable circuit controlling cell fate decisions in embryonic stem  
947 cells. *Development* **142**:4205–4216. doi:10.1242/dev.127530  
948 Shankaran H, Ippolito DL, Chrisler WB, Resat H, Bollinger N, Opresko LK, Wiley HS. 2009.  
949 Rapid and sustained nuclear–cytoplasmic ERK oscillations induced by epidermal  
950 growth factor. *Mol Syst Biol* **5**:332. doi:10.1038/msb.2009.90  
951 Simon CS, Rahman S, Raina D, Schröter C, Hadjantonakis A-K. 2020. Live Visualization of  
952 ERK Activity in the Mouse Blastocyst Reveals Lineage-Specific Signaling Dynamics.  
953 *Dev Cell* **55**:341–353.e5. doi:10.1016/j.devcel.2020.09.030  
954 Singh AM, Hamazaki T, Hankowski KE, Terada N. 2007. A Heterogeneous Expression  
955 Pattern for Nanog in Embryonic Stem Cells. *Stem Cells* **25**:2534–2542.  
956 doi:10.1634/stemcells.2007-0126  
957 Sparta B, Pargett M, Minguet M, Distor K, Bell G, Albeck JG. 2015. Receptor level  
958 mechanisms are required for epidermal growth factor (EGF)-stimulated extracellular  
959 signal-regulated kinase (ERK) activity pulses. *J Biol Chem* **290**:24784–24792.  
960 doi:10.1074/jbc.M115.662247  
961 Sturm OE, Orton R, Grindlay J, Birtwistle M, Vyshemirsky V, Gilbert D, Calder M, Pitt A,  
962 Kholodenko B, Kolch W. 2010. The Mammalian MAPK/ERK Pathway Exhibits  
963 Properties of a Negative Feedback Amplifier. *Sci Signal* **3**:ra90.  
964 doi:10.1126/scisignal.2001212  
965 Tinevez J-Y, Perry N, Schindelin J, Hoopes GM, Reynolds GD, Laplantine E, Bednarek SY,  
966 Shorte SL, Eliceiri KW. 2017. TrackMate: An open and extensible platform for single-  
967 particle tracking. *Methods* **115**:80–90. doi:10.1016/j.ymeth.2016.09.016  
968 Toyooka Y, Shimosato D, Murakami K, Takahashi K, Niwa H. 2008. Identification and  
969 characterization of subpopulations in undifferentiated ES cell culture. *Development*  
970 **135**:909–918. doi:10.1242/dev.017400  
971 Tsai TYC, Yoon SC, Ma W, Pomerening JR, Tang C, Ferrell JE. 2008. Robust, tunable  
972 biological oscillations from interlinked positive and negative feedback loops. *Science*  
973 **321**:126–139. doi:10.1126/science.1156951  
974 Virtanen P, Gommers R, Oliphant TE, Haberland M, Reddy T, Cournapeau D, Burovski E,  
975 Peterson P, Weckesser W, Bright J, van der Walt SJ, Brett M, Wilson J, Millman KJ,  
976 Mayorov N, Nelson ARJ, Jones E, Kern R, Larson E, Carey CJ, Polat İ, Feng Y, Moore  
977 EW, VanderPlas J, Laxalde D, Perktold J, Cimrman R, Henriksen I, Quintero EA, Harris  
978 CR, Archibald AM, Ribeiro AH, Pedregosa F, van Mulbregt P. 2020. SciPy 1.0:  
979 fundamental algorithms for scientific computing in Python. *Nat Methods* **17**:261–272.  
980 doi:10.1038/s41592-019-0686-2  
981 Webb AB, Lengyel IM, Jörg DJ, Valentin G, Jülicher F, Morelli LG, Oates AC. 2016.  
982 Persistence, period and precision of autonomous cellular oscillators from the zebrafish  
983 segmentation clock. *Elife* **5**:e08438. doi:10.7554/eLife.08438  
984 Westendorf C, Negrete J, Bae AJ, Sandmann R, Bodenschatz E, Beta C. 2013. Actin  
985 cytoskeleton of chemotactic amoebae operates close to the onset of oscillations. *Proc*  
986 *Natl Acad Sci U S A* **110**:3853–3858. doi:10.1073/pnas.1216629110  
987

988

989

990 Supplementary Figures:

991

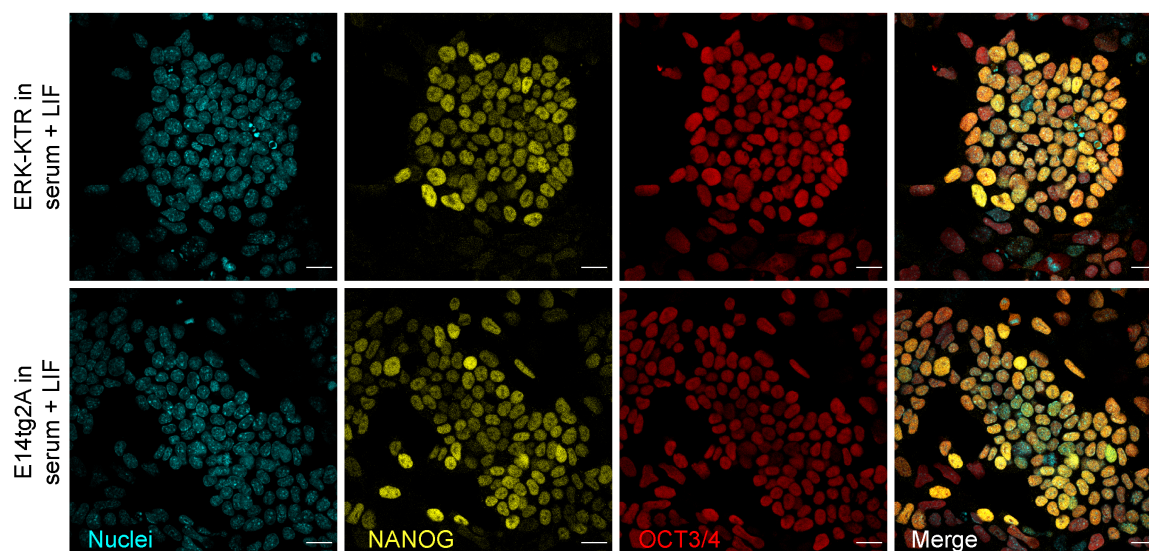

992

993 **Fig. 1 Supp. 1. Reporter cells and parental cells express similar levels of pluripotency**  
994 **markers**

995 *A. Immunostaining of ERK-KTR mESCs (top row) and the parental E14tg2a line (bottom row) for expression of*  
996 *pluripotency markers NANOG (yellow) and OCT3/4 (red). Nuclei in cyan. Scale bar = 20  $\mu$ m.*

997

998

999

1000

1001

1002

1003

1004

1005

1006

1007

1008

1009

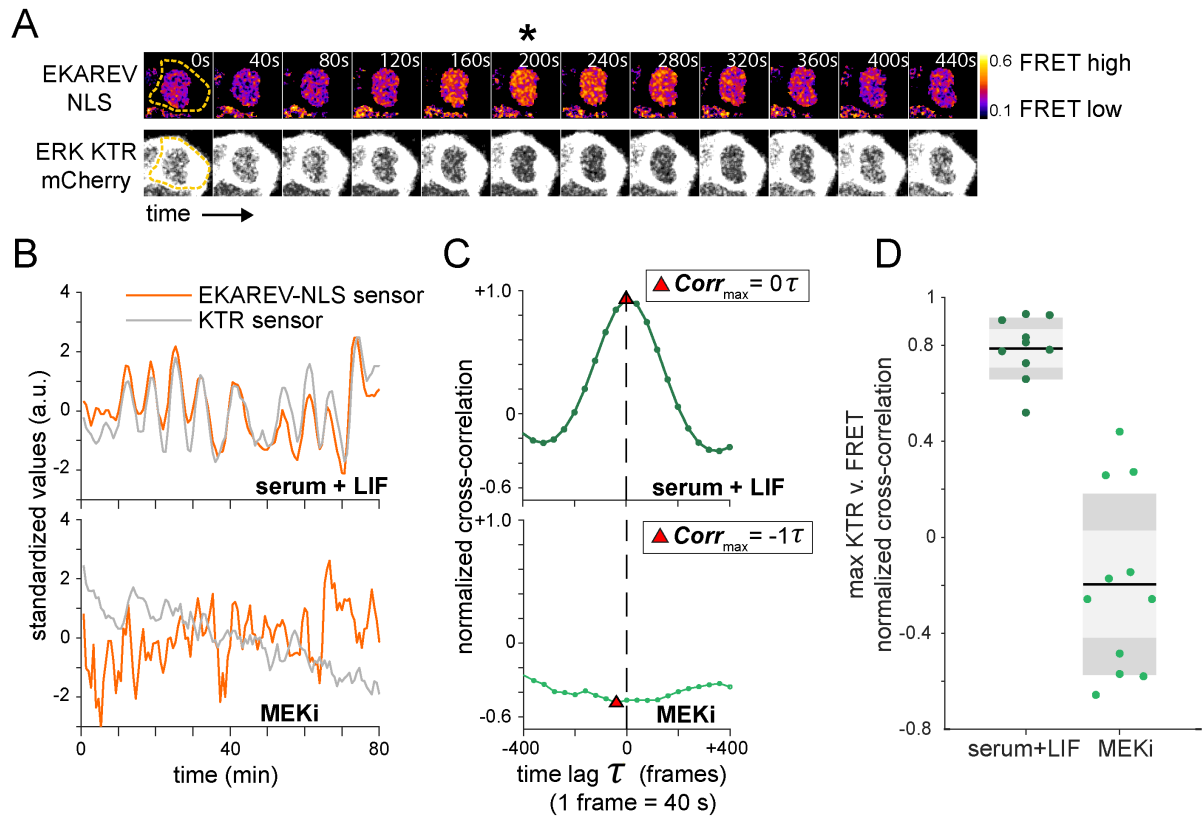

1010

1011

### Fig. 1 Supp. 2. Orthogonal ERK activity sensors report similar dynamics

1012

1013

1014

1015

1016

1017

1018

1019

1020

1021

1022

1023

1024

1025

1026

1027

**A.** Stills from a movie of mESCs growing in serum + LIF medium co-transfected with both an ERK-KTR-mCherry and an EKAREV-CFP-YFP FRET reporter. Upper row shows ratiometric images of a single cell expressing the EKAREV sensor, bottom row shows images of the same cell expressing the KTR-mCherry sensor. High ERK activity detected by the FRET reporter coincides with strong nuclear exclusion of the KTR reporter (asterisk). Gamma values for the KTR montage have been adjusted to 0.86, and the image has been smoothed for the purpose of visualization only. The acquisition rate was 40 s/frame. **B.** Single cell trace of mean nuclear intensity (KTR reporter, grey) and mean FRET ratio (EKAREV reporter, orange) in the same nuclear ROI over time in the absence (top) and the presence of MEKi (bottom). FRET ratio was calculated as the ratio between donor emission and acceptor emission upon donor excitation. Traces are standardized by subtracting the mean and then dividing by the standard deviation of every individual trace. **C.** Normalized cross correlation for data shown in **B.** between traces of the different sensors as a function of time lag  $\tau$ . **D.** Summary statistics of maximum cross correlation over a lag of  $\pm 400$  s between both reporters in pluripotency ( $N = 10$  cells) and MEKi ( $N = 11$  cells) conditions.



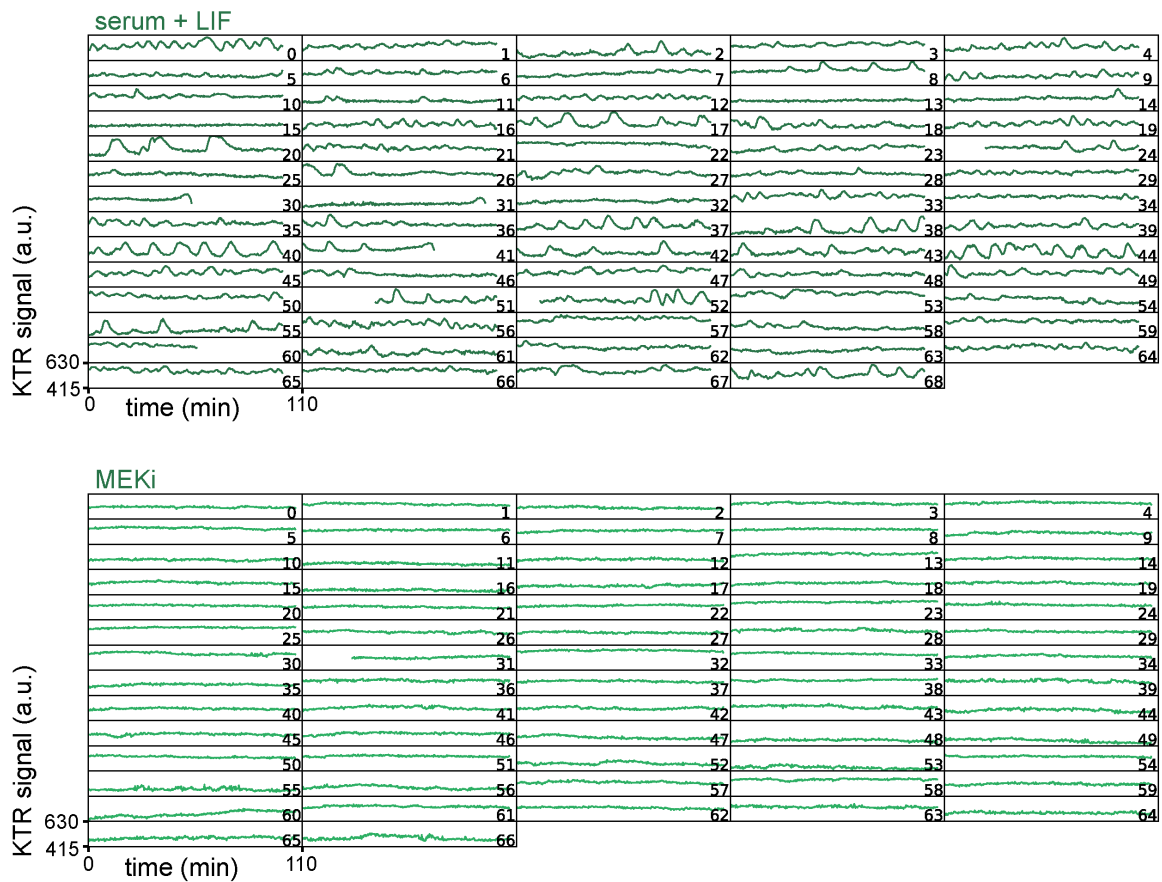

1028

1029 **Fig. 1 Supp. 3. Dynamics of KTR signal reveals ERK pulsing in serum + LIF conditions**

1030 *Traces of the KTR signal obtained as the mean inverted fluorescence intensity within a nuclear ROI in single cells*

1031 *growing in serum + LIF without (top) and with MEKi (bottom). The decrease in KTR signal at the end of the trace*

1032 *in cells 30, 31, 41 and 50 in the condition without MEKi is due to nuclear envelope breakdown as cells enter mitosis.*

1033 *This part of the trace, together with the immediately preceding peak, was trimmed for the downstream analysis.*

1034 *The acquisition rate was 20 s/frame.*

1035

1036

1037

1038

1039

1040

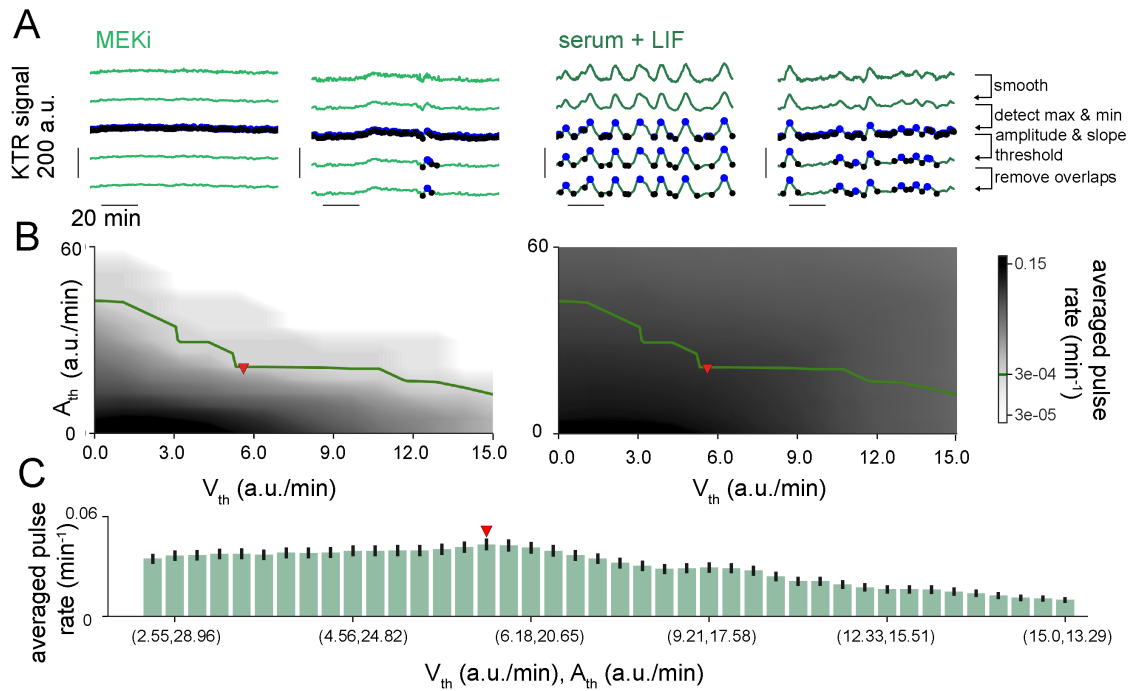

1041

1042

1043 **Fig. 2 Supp. 1. Pulse recognition and threshold analysis in high resolution time-series**

1044 **A.** Representative traces of ERK dynamical activity in single ESCs growing in serum + LIF conditions in the  
 1045 presence (two columns on the left) or absence (two columns on the right) of MEKi. Rows illustrate the  
 1046 pulse recognition algorithm: First row shows raw data, second row shows smoothed traces. Blue and black dots  
 1047 in the third row are local maxima and minima. Fourth row shows local maxima and minima that pass the amplitude  
 1048 and slope thresholds. Fifth row shows identified pulses after removing overlaps. Pulses are defined by maxima and  
 1049 their adjacent minima. **B.** Average pulse rate as a function of amplitude and slope thresholds for cells growing in  
 1050 serum + LIF with (left) or without (right) MEKi. The level curve where the average pulse rate in MEKi-treated cells  
 1051 is  $3 \times 10^{-4} \text{min}^{-1}$  (green line) was used to explore combinations of amplitude and slope threshold values in the  
 1052 condition without inhibitor. **C.** Average pulse rate for combinations of amplitude and slope thresholds along the red  
 1053 curve in cells growing in serum + LIF only. Error bar indicates SEM. Red triangle in **B**, **C** indicates parameter values  
 1054 used for subsequent analysis (Methods, Supp. Table T1).

1055

1056

1057

1058

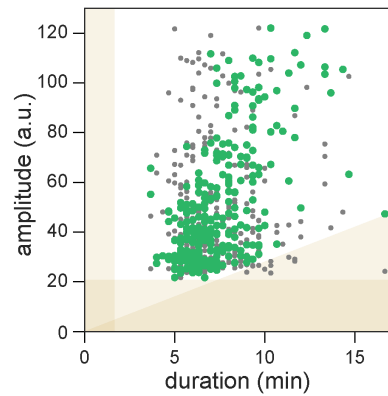

1059

1060

**Fig. 2 Supp. 2. Correlation of pulse amplitude and duration in cells growing in serum + LIF**

1061

1062

*Amplitude vs. pulse duration for individual pulses (green dots). Grey dots show randomly shuffled values for comparison. Shaded yellow regions indicate the pulse recognition limits determined by the slope (yellow triangle) and amplitude (horizontal bar) thresholds in the pulse recognition algorithm, as well as the sampling resolution (vertical bar).*

1063

1064

1065

1066

1067

1068

1069

1070

1071

1072

1073

1074

1075

1076

1077

1078

1079

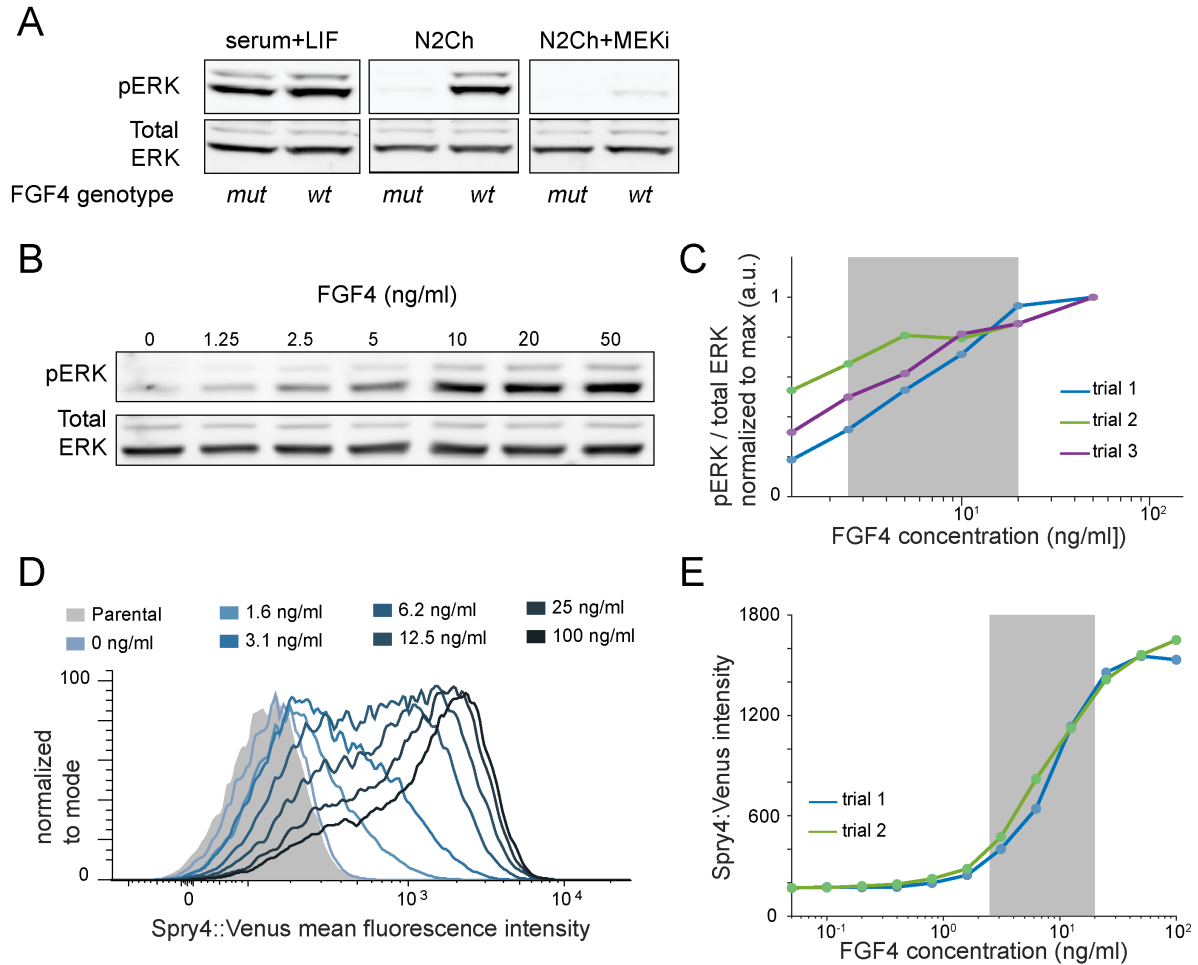

1080

1081

1082 **Fig. 3 Supp. 1. Dynamic range of signaling and transcriptional response to FGF4 dose**

1083

**in ESCs**

1084 **A.** Western blot for pERK and total ERK in wild type and *Fgf4* mutant cells growing in the indicated media

1085 conditions. **B.** Representative western blot for pERK and total ERK in *Fgf4* mutant cells treated with a range of

1086 FGF4 concentrations, with the same experimental protocol as in Fig. 3A. **C.** Quantification of western blot data

1087 from  $N = 3$  independent experiments. **D.** Flow cytometry of *Fgf4*<sup>mutant</sup>, *Spry4*<sup>H2B-Venus/H2B-Venus</sup> cells stimulated with a

1088 range of FGF4 concentrations as described in the methods. A non-reporter line was used as the negative control

1089 (shaded in grey). **E.** Quantification of the mean H2B-Venus fluorescence intensity from **D.** Gray box in **C** and **E**

1090 indicates the concentration range used in this study from 2.5 to 20 ng/ml.

1091

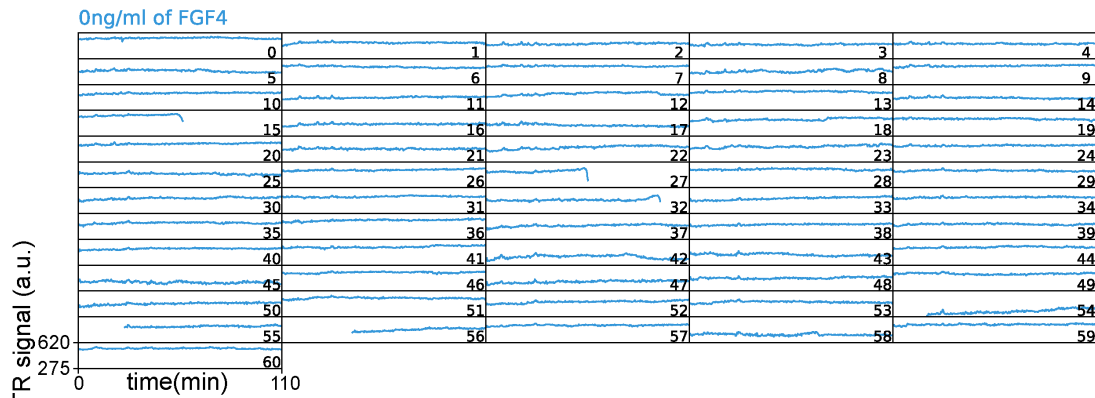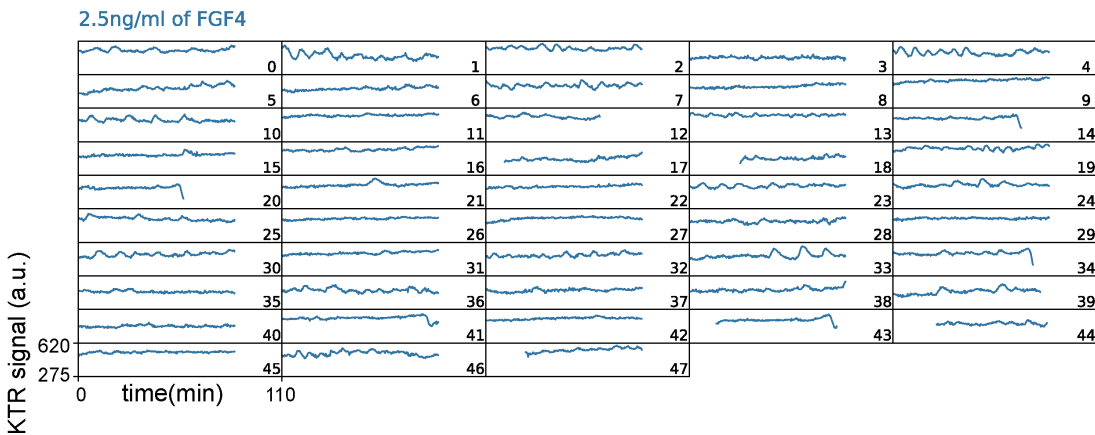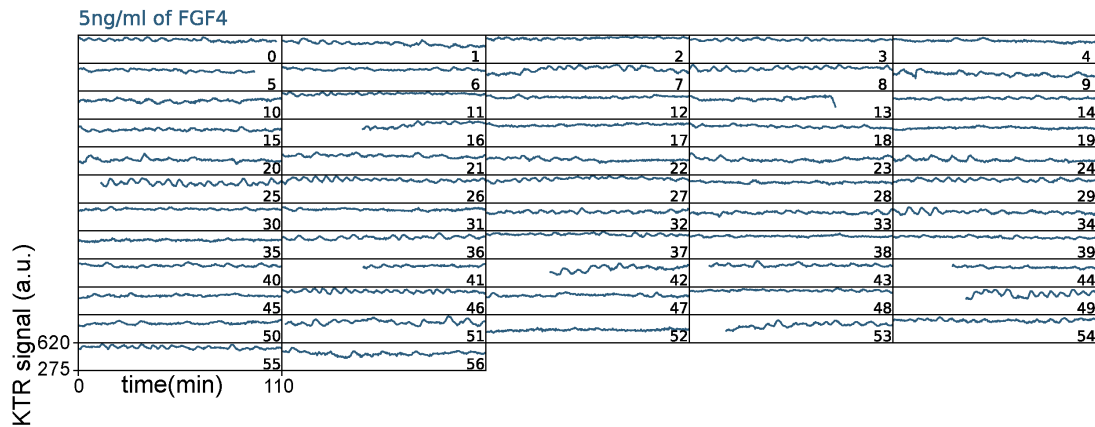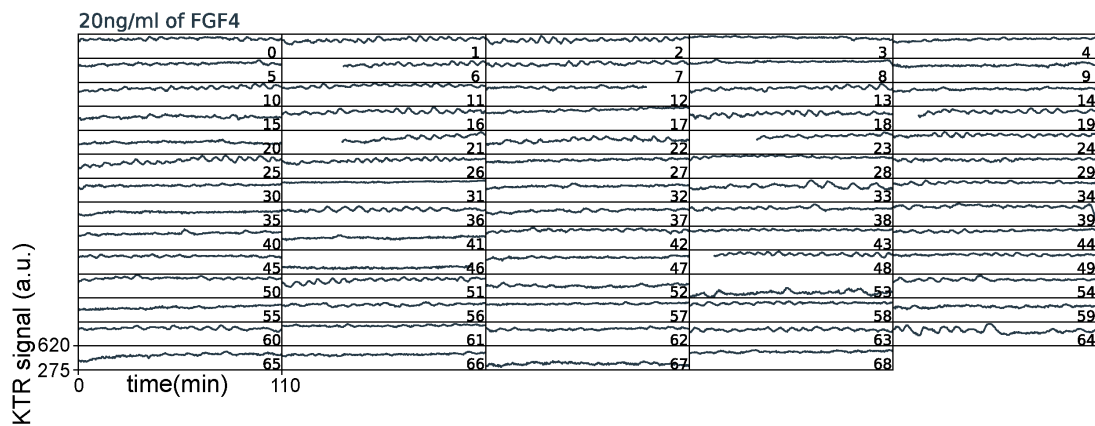

1093  
1094  
1095  
1096  
1097  
1098  
1099  
1100  
1101  
1102  
1103  
1104  
1105  
1106  
1107  
1108  
1109  
1110  
1111  
1112  
1113  
1114  
1115  
1116  
1117  
1118  
1119  
1120  
1121  
1122

**Fig. 3 Supp. 2. Dynamics of KTR signal at different FGF4 doses**

*Traces of the KTR signal obtained as the mean inverted fluorescence intensity within a nuclear ROI in single Fgf4 mutant cells stimulated with indicated doses of FGF4. The decrease in KTR signal at the end of the trace in cells 15, 27 and 32 (0 ng/ml), cells 14, 20, 34, 38, 41, 43, and 44 (2.5 ng/ml), cell 13 (5 ng/ml) and cells 8 and 39 (20 ng/ml) is due to nuclear envelope breakdown as cells enter mitosis. This part of the trace, together with the immediately preceding peak, was trimmed for the downstream analysis. The acquisition rate was 20 s/frame.*

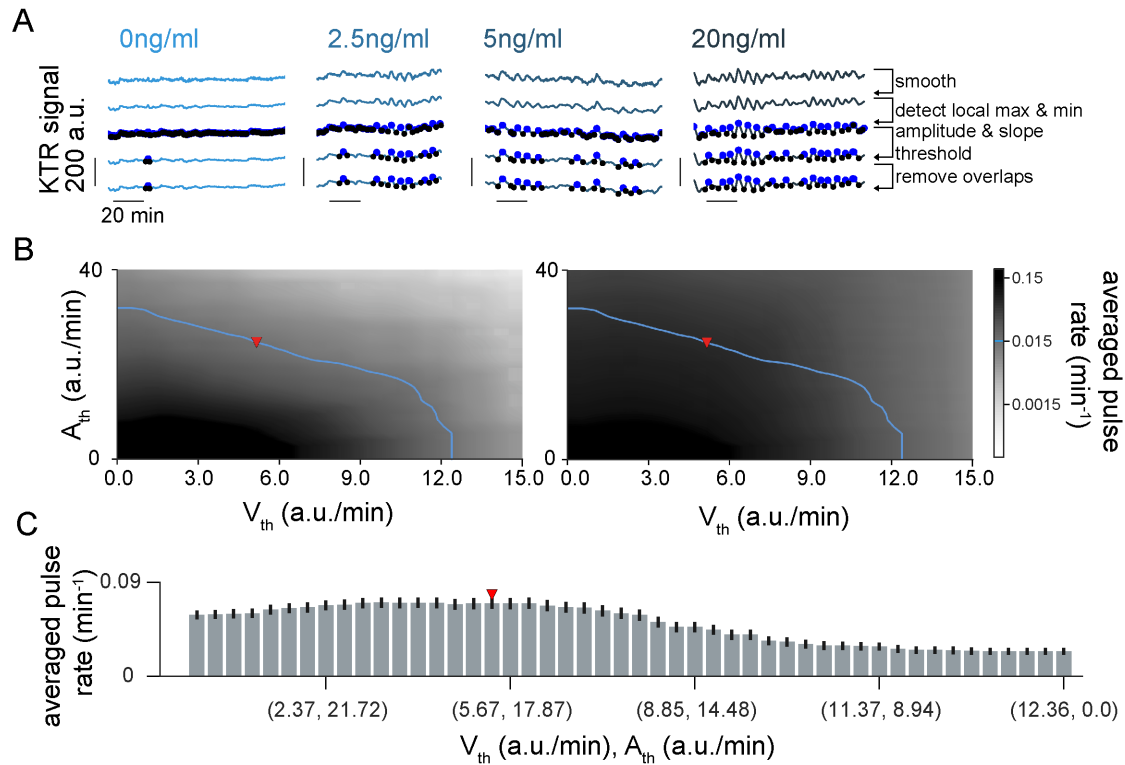

1123

1124

1125

**Fig. 3 Supp. 3. Pulse recognition and threshold analysis in FGF4 stimulation experiment**

1126

1127 **A.** Representative traces of ERK dynamical activity in single *Fgf4* mutant cells stimulated with different doses of  
 1128 FGF4 with colors as in Fig. 3 (columns). Rows illustrate steps in the pulse recognition algorithm: First row shows  
 1129 raw data, second row shows smoothed traces. Blue and black dots in the third row are local maxima and minima.  
 1130 Fourth row shows local maxima and minima that pass the amplitude and slope thresholds. Fifth row shows  
 1131 identified pulses after removing overlaps. Pulses are defined by maxima and their adjacent minima. **B.** Average  
 1132 pulse rate as a function of amplitude and slope thresholds for *Fgf4* mutant without stimulation (left) and stimulated  
 1133 with 20 ng/ml FGF4 (right). The level curve where the average pulse rate in unstimulated cells is  $0.015 \text{ min}^{-1}$  (blue  
 1134 line) was used to explore combinations of amplitude and slope threshold values in the stimulated conditions. **C.**  
 1135 Average pulse rate for combinations of amplitude and slope thresholds along the blue curve in *Fgf4* mutant cells  
 1136 stimulated with 20 ng/ml of FGF4. Error bar indicates SEM. Red triangle in **B**, **C** indicates parameter values used  
 1137 for subsequent analysis (Methods, Supp. Table T1).

1138

1139

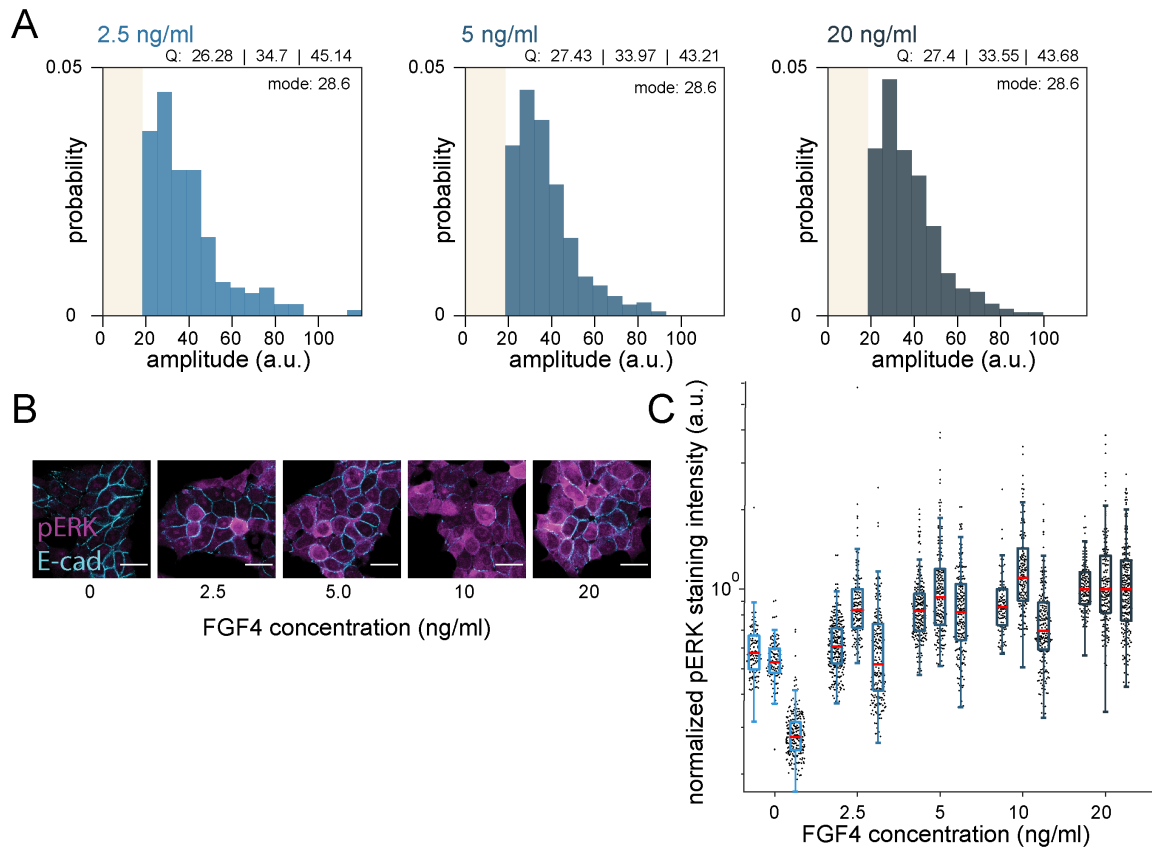

1140

1141 **Fig. 3 Supp. 4. Distribution of pulse amplitudes and single cell pERK levels at different**  
1142 **FGF4 doses**

1143 **A.** Distribution of sensor pulse amplitudes in *Fgf4* mutant cells stimulated with different doses of FGF4. The number  
1144 of pulses was  $n = 164$  (2.5 ng/ml),  $n = 426$  (5 ng/ml) and  $n = 544$  (20 ng/ml). Pulse recognition resolution limit  
1145 (yellow bar) and quartiles (Q) 25, 50 and 75 are indicated, and histograms are normalized to 1. **B.** Immunostaining  
1146 of *Fgf4* mutant cells for pERK (magenta) and E-Cadherin (cyan) to outline cell boundaries. Cells were treated with  
1147 indicated concentrations of FGF4, with the experimental protocol depicted in Fig. 3A. Scale bar = 20  $\mu$ m. **C.** Boxplot  
1148 of pERK intensity in single cells stained as in **B.** Black dots represent individual cells, red bars are the median, box  
1149 bounds are the 25 and 75 percentiles of the distributions, and whiskers are the 5 and 95 percentiles. Data for 3  
1150 replicates are shown for each condition. Intensity values are normalized to the median of the 20 ng/ml condition for  
1151 each experiment to facilitate comparison.

1152

1153



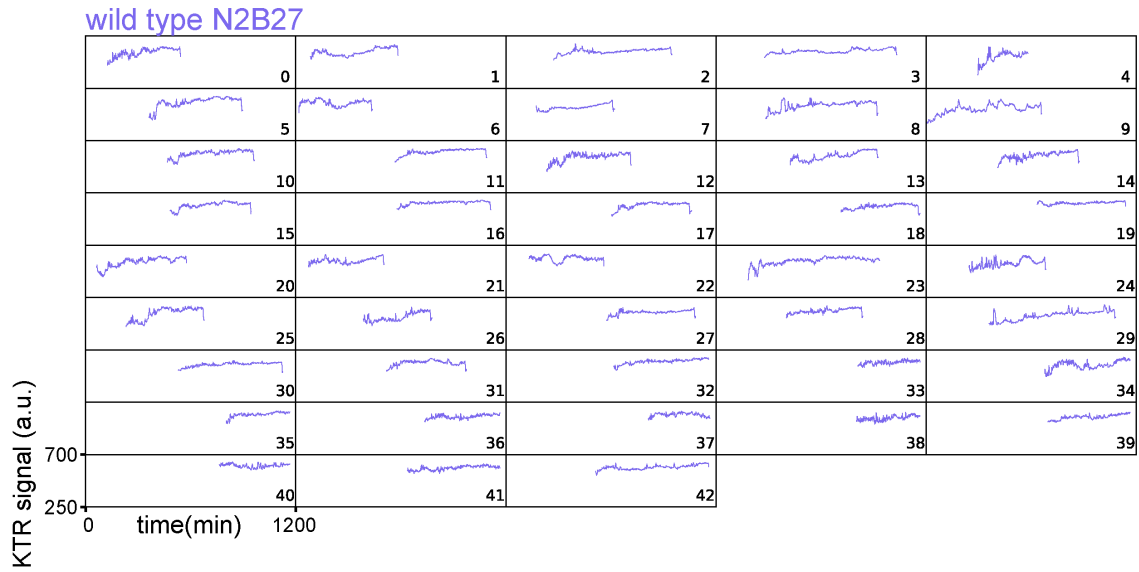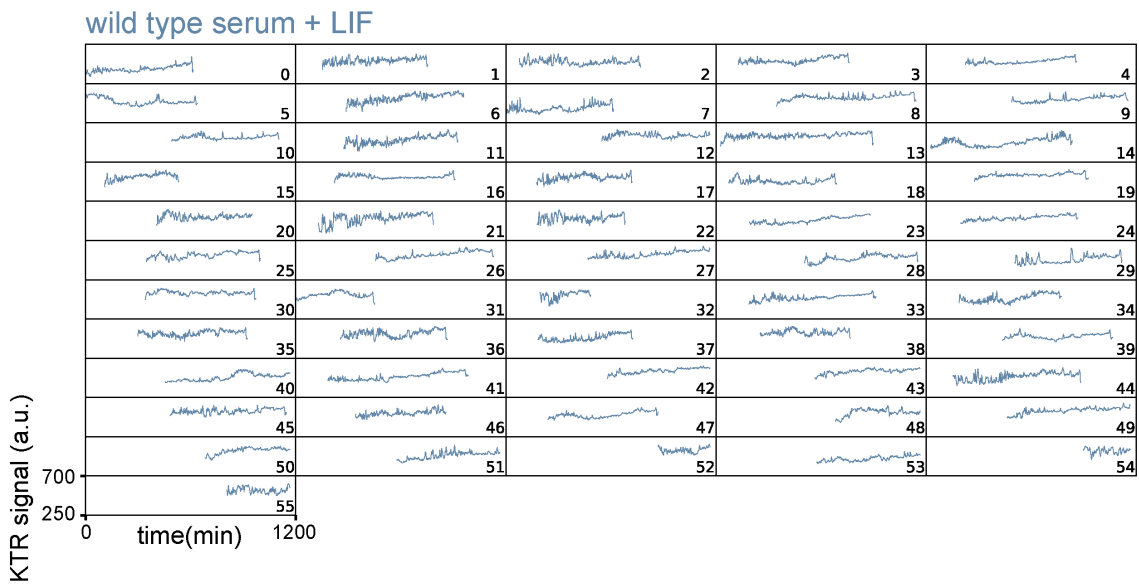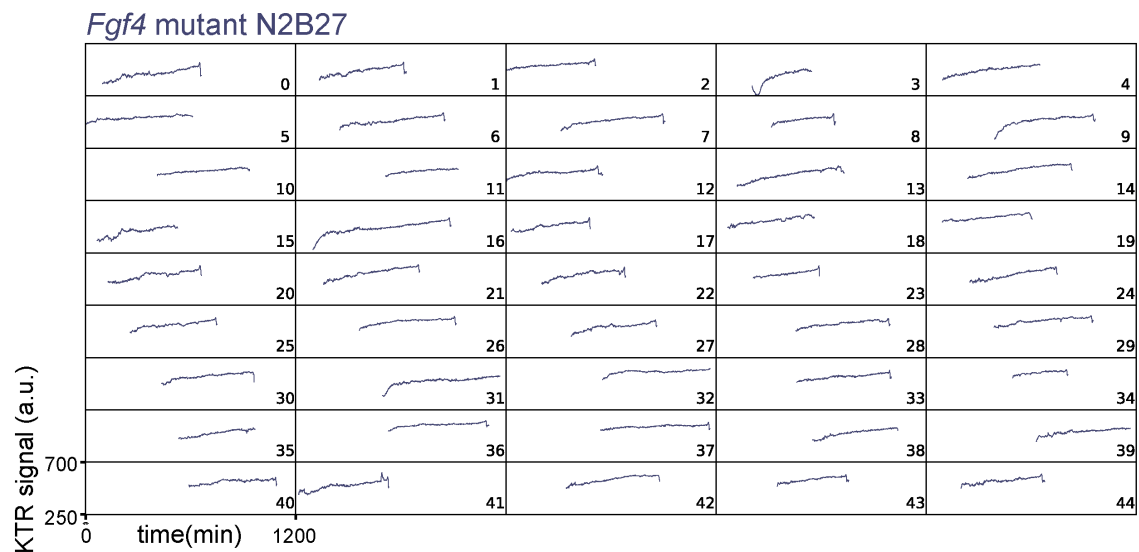

1154

1155

**Fig. 4 Supp. 1. Dynamics of KTR signal in long term recordings**

1156 *Traces of the KTR signal obtained as the mean inverted fluorescence intensity within a nuclear ROI in wild type*  
1157 *cells growing in N2B27 (top), serum + LIF (middle), and in Fgf4 mutant cells growing in N2B27 (bottom). The*  
1158 *acquisition rate was 105 s/frame. The scale of the horizontal axis represents absolute experimental time. Single*  
1159 *cell tracks begin immediately after a cell division event and are plotted relative to absolute experimental time. Most*  
1160 *traces end with exclusion of the sensor from the nucleus before cell division. This part of the traces, together with*  
1161 *the immediately preceding peak, was trimmed for the downstream analysis.*

1162

1163

1164

1165

1166

1167

1168

1169

1170

1171

1172

1173

1174

1175

1176

1177

1178

1179

1180

1181

1182

1183

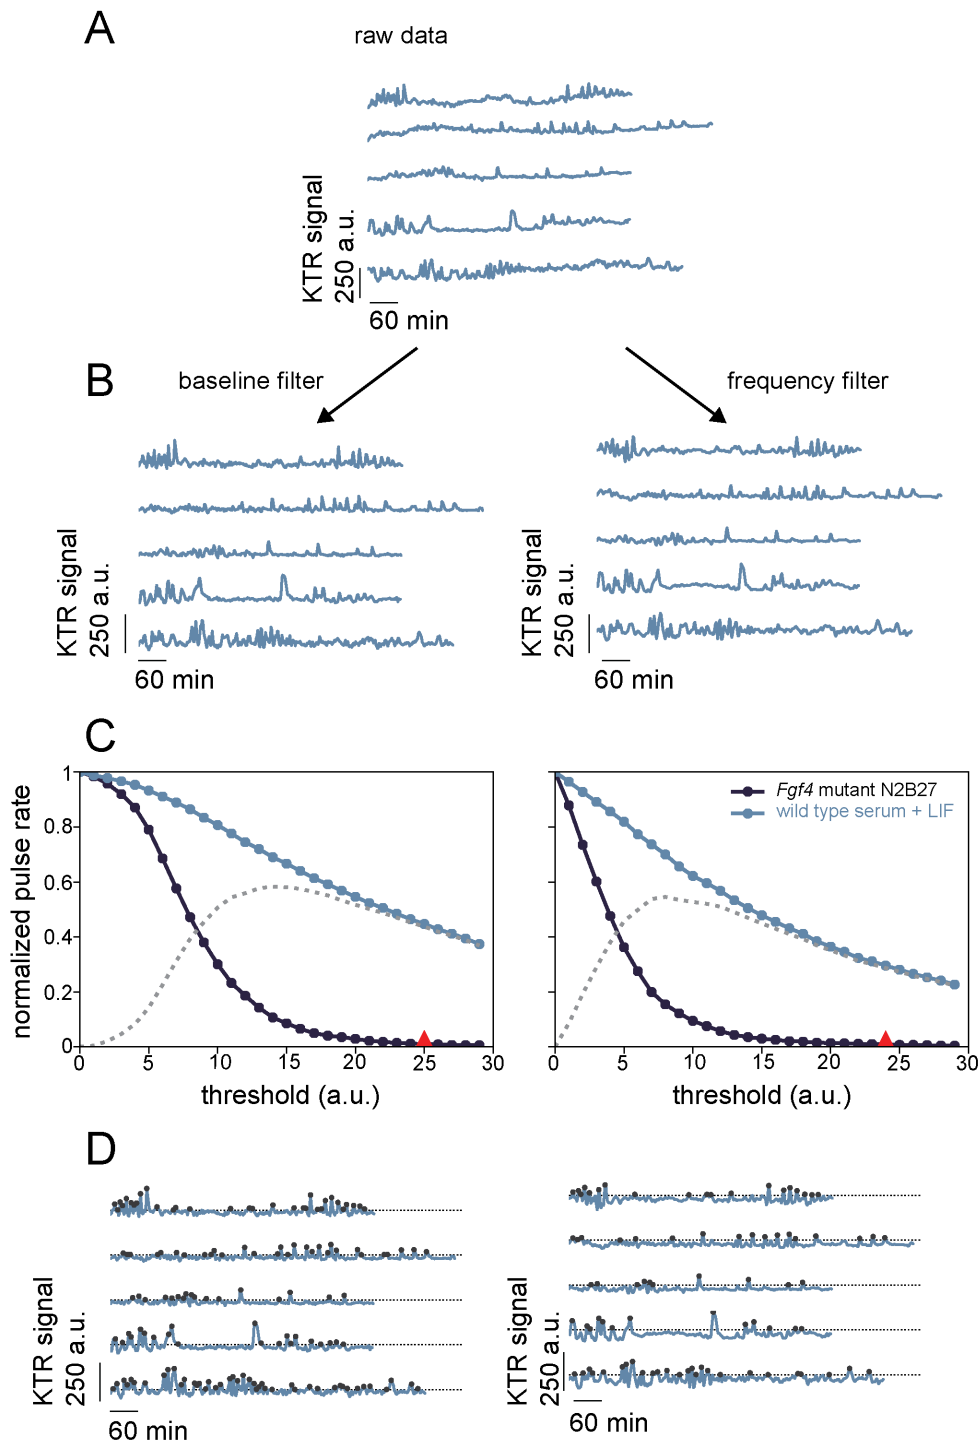

1184

1185

1186 **Fig. 4 Supp. 2. Peak detection and threshold analysis in long term time series**

1187 **A.** Representative traces of KTR signal from long term recordings in single wild type cells growing in serum + LIF.

1188 Traces have been aligned relative to the time of cell birth for this illustration. **B - D** illustrate the two filtering

1189 strategies, left column corresponds to baseline filtering and right column to band-pass filtering (Methods). **B.** Same

1190 traces as in **A** following filtering. **C.** Plot of normalized pulse rate vs. filtered KTR signal threshold to explore how

1191 the number of detected pulses depends on threshold value. *Fgf4* mutant cells growing in N2B27 in dark blue, wild

1192 type cells growing in serum + LIF in light blue. The gray dotted line represents the difference of the normalized

1193 *pulse rates between the experimental conditions considered. The position of the selected intensity threshold value*  
1194  *$I_{th}$  is marked with a red triangle. **D.** Same traces as in **B** with identified peaks (black dots). The dotted grey line in*  
1195 *indicates the selected threshold parameter  $I_{th}$ .*

1196

1197

1198

1199

1200

1201

1202

1203

1204

1205

1206

1207

1208

1209

1210

1211

1212

1213

1214

1215

1216

1217

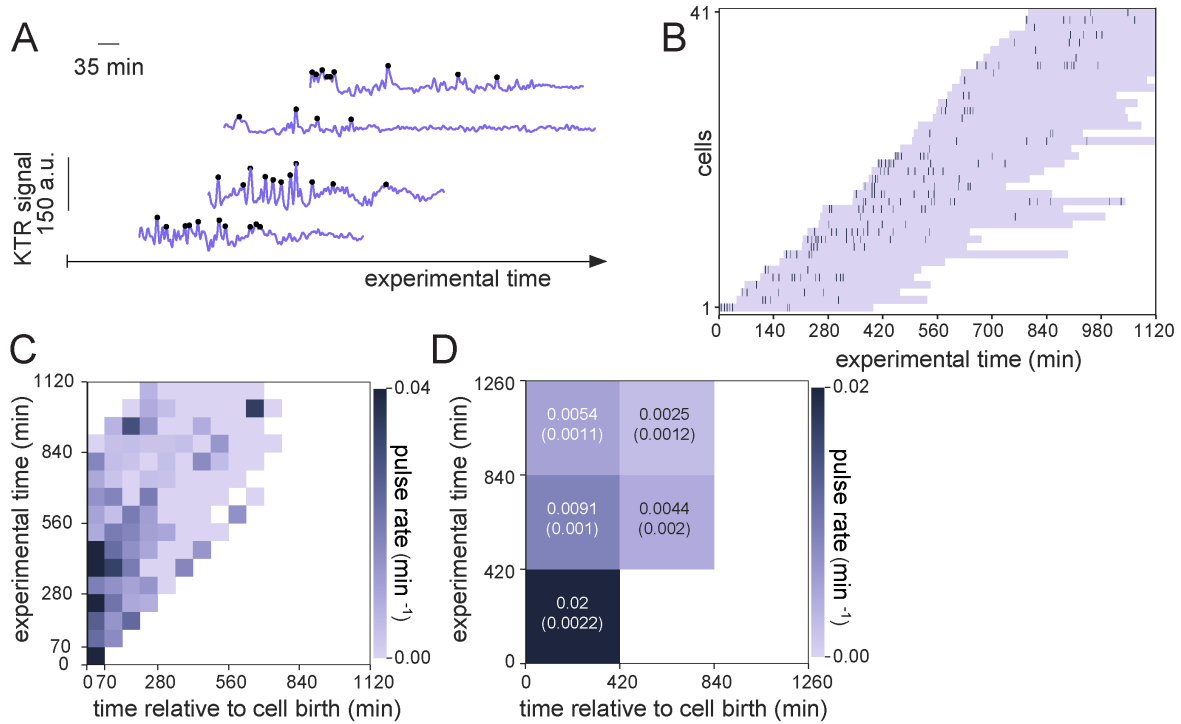

1218

1219

1220

1221

1222

**Fig. 4. Supp. 3. The alternative frequency filtering strategy confirms prevalent ERK pulsing early in the cell cycle**

1223

1224

1225

1226

1227

1228

1229

1230

1231

1232

1233

**A.** Representative traces of ERK dynamical activity from the same experiment reported in Fig. 4, now following the alternative frequency filtering strategy. Identified peaks indicated as black dots. **B.** Raster plot displaying the timing of ERK activity peaks across the cell cycle in frequency-filtered data. Rows correspond to single cells and dark bars represent peaks. Single cell tracks begin immediately after a cell division event and are plotted relative to absolute experimental time. **C.** Pulse rate map for the data shown in B. Time is discretized into 70 min bins. **D.** Coarse grained pulse rate map showing average pulse rate and its estimated error with 420 min binning.

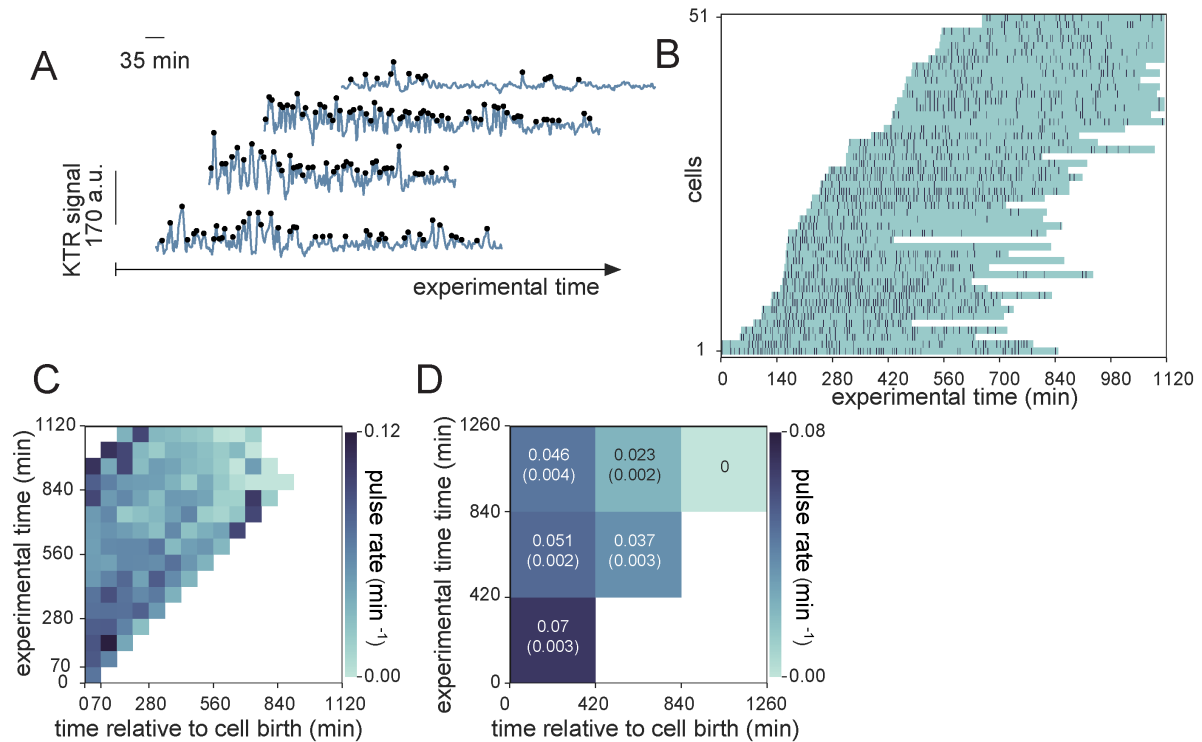

1234

1235

1236

**Fig. 4. Supp. 4. Prevalent ERK pulsing early in the cell cycle in cells growing in serum + LIF**

1237

1238

1239

1240

1241

1242

1243

1244

1245

1246

1247

1248

1249

1250

1251

1252

1253

1254

**A.** Representative traces of ERK dynamical activity with identified peaks (black dots) in wild type cells growing in serum + LIF. Experimental protocol and baseline filtering strategy are the same as in Fig. 4. **B.** Raster plot displaying the timing of ERK activity peaks across the cell cycle in cells growing in serum + LIF. Rows correspond to single cells and dark bars represent peaks. Single cell tracks begin immediately after a cell division event and are plotted relative to absolute experimental time. **C.** Pulse rate map for the data shown in **B.** Time is discretized into 70 min bins. **D.** Coarse grained pulse rate map showing average pulse rate and its estimated error with 420 min binning.

1255 **Tables:**

1256

| Experiment                                     | Negative control condition         | Positive control condition          | Exploratory parameter space                                                                                                         | Level curve ( $\delta_p^*$ ) | Selected amplitude threshold | Selected slope threshold |
|------------------------------------------------|------------------------------------|-------------------------------------|-------------------------------------------------------------------------------------------------------------------------------------|------------------------------|------------------------------|--------------------------|
| Wild type constant stimulation                 | MEKi                               | serum + LIF                         | $v_{th}$ : (0-15) $\frac{a.u.}{min}$ with a $0.25 \frac{a.u.}{min}$ resolution.<br>$A_{th}$ : (0-60) a.u. with a 1 a.u. resolution. | $3 \times 10^{-4} min^{-1}$  | 20.68 a.u.                   | $5.61 \frac{a.u.}{min}$  |
| <i>Fgf4</i> mutant, different FGF4 stimulation | <i>Fgf4</i> mutant 0 ng/ml of FGF4 | <i>Fgf4</i> mutant 20 ng/ml of FGF4 | $v_{th}$ : (0-15) $\frac{a.u.}{min}$ with a $0.5 \frac{a.u.}{min}$ resolution.<br>$A_{th}$ : (0-40) a.u. with a 1 a.u. resolution.  | $0.015 min^{-1}$             | 18.47 a.u.                   | $5.16 \frac{a.u.}{min}$  |

1257 **Supp. Table T1.** *Pulse detection parameters for the threshold analysis protocol, including the*  
 1258 *amplitude and slope thresholds resulting from this protocol in the two experiments analyzed.*

1259

1260

1261

1262

1263

1264

1265

1266

1267

1268

1269

1270

1271

1272

1273

1274

| <b>Pulse rate</b>          |               |             |              |                   |
|----------------------------|---------------|-------------|--------------|-------------------|
| <b>X / Y</b>               | <b>2.5 ng</b> | <b>5 ng</b> | <b>20 ng</b> | <b>Total data</b> |
| <b>2.5 ng</b>              | 1.000         | 0.009       | 0.005        | 48                |
| <b>5 ng</b>                | 0.009         | 1.000       | 0.727        | 57                |
| <b>20 ng</b>               | 0.005         | 0.727       | 1.000        | 69                |
| <b>Pulse duration</b>      |               |             |              |                   |
| <b>X / Y</b>               | <b>2.5 ng</b> | <b>5 ng</b> | <b>20 ng</b> | <b>Total data</b> |
| <b>2.5 ng</b>              | 1.000         | 0.059       | 0.002        | 164               |
| <b>5 ng</b>                | 0.059         | 1.000       | 0.340        | 426               |
| <b>20 ng</b>               | 0.002         | 0.340       | 1.000        | 544               |
| <b>Amplitude</b>           |               |             |              |                   |
| <b>X / Y</b>               | <b>2.5 ng</b> | <b>5 ng</b> | <b>20 ng</b> | <b>Total data</b> |
| <b>2.5 ng</b>              | 1.000         | 0.432       | 0.586        | 164               |
| <b>5 ng</b>                | 0.432         | 1.000       | 0.835        | 426               |
| <b>20 ng</b>               | 0.586         | 0.835       | 1.000        | 544               |
| <b>Interpulse interval</b> |               |             |              |                   |
| <b>X / Y</b>               | <b>2.5 ng</b> | <b>5 ng</b> | <b>20 ng</b> | <b>Total data</b> |
| <b>2.5 ng</b>              | 1.000         | 0.044       | < 0.001      | 124               |
| <b>5 ng</b>                | 0.044         | 1.000       | 0.014        | 370               |
| <b>20 ng</b>               | < 0.001       | 0.014       | 1.000        | 479               |
| <b>Consecutive pulses</b>  |               |             |              |                   |
| <b>X / Y</b>               | <b>2.5 ng</b> | <b>5 ng</b> | <b>20 ng</b> | <b>Total data</b> |
| <b>2.5 ng</b>              | 1.000         | 0.099       | 0.082        | 48                |
| <b>5 ng</b>                | 0.099         | 1.000       | 0.837        | 57                |
| <b>20 ng</b>               | 0.082         | 0.837       | 1.000        | 69                |
| <b>References</b>          |               |             |              |                   |
| > 0.05                     | < 0.05        | < 0.01      | < 0.005      | < 0.001           |



1276 **Supp. Table T2.** *Kolmogorov-Smirnov two sample test p-value,  $K[x,y]$ . Cells values are*  
1277 *rounded to three decimals after zero and color coded according to different p-value thresholds,*  
1278 *the color code is given at the table bottom. The total number of data points for each condition*  
1279 *is indicated on the rightmost column of the table. The low number of pulses at 0 ng/ml*  
1280 *precluded statistical analysis of this condition.*

1281

1282
